# Supplementary material for: Organ Function-Derived Protein Clocks Demonstrate Enhanced Prediction of Organ-Specific Disease and Mortality Risk
Source: Research Square preprint supplement (doi:10.21203/rs.3.rs-6273836/v1), 2025-04-29
Supplement: Supplementary file 1 [file 74686696acb4d0b127987046.docx]

**Supplementary Information**

Supplementary Fig. 1


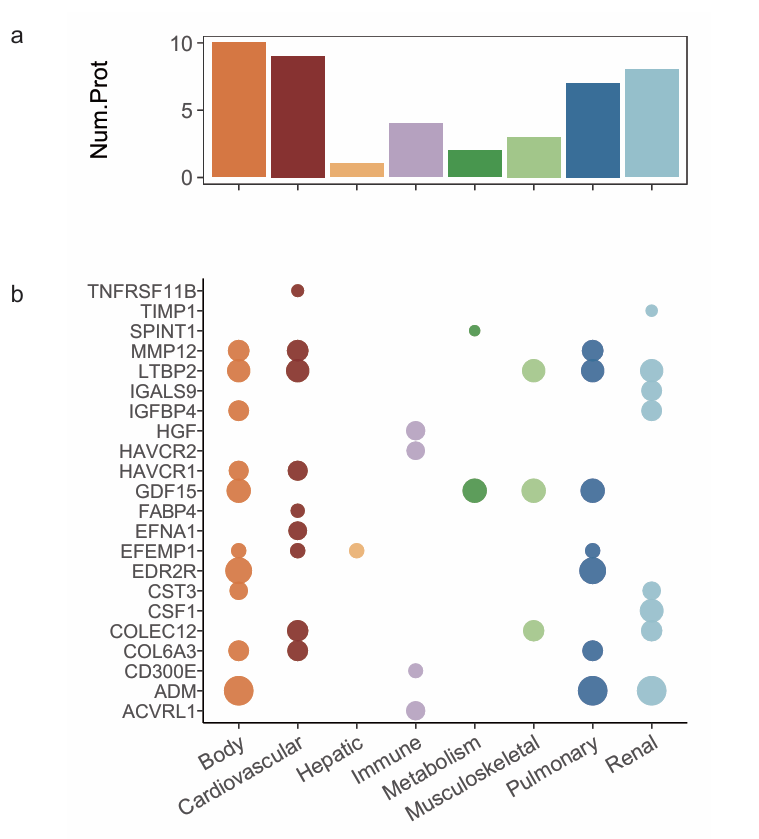


**Supplementary Fig. 1 Mortality-Related Proteins** (a) Overlap count of mortality-related proteins with the top 50 predictors from each organ. (b) Hazard ratios for the overlapping proteins between mortality-related proteins and the top 50 predictors for each organ; circle size reflects the corresponding HR value.

Supplementary Fig.2


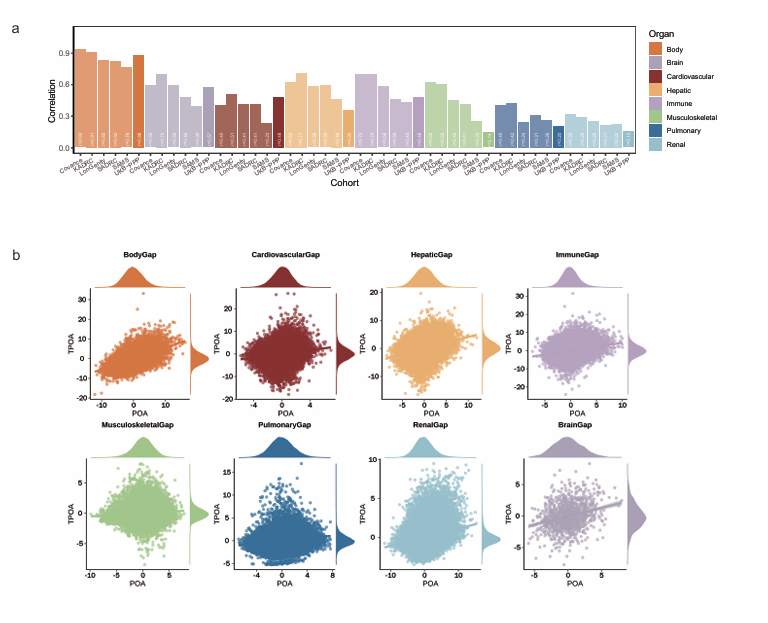


**Supplementary Fig. 2 TPOA performance in UKBB cohort**. (a) The performance metrics of TPOA models – reconstructed in the UKBB-PPP dataset, evaluation on the UKBB test dataset, contrasted with published statistics by Oh, et al. 1 (2023) ; (b) Scatterplots comparing actual POA age gaps (x-axis) versus POA age gaps (y-axis) in the UK Biobank-PPP dataset;

Supplementary Fig.3


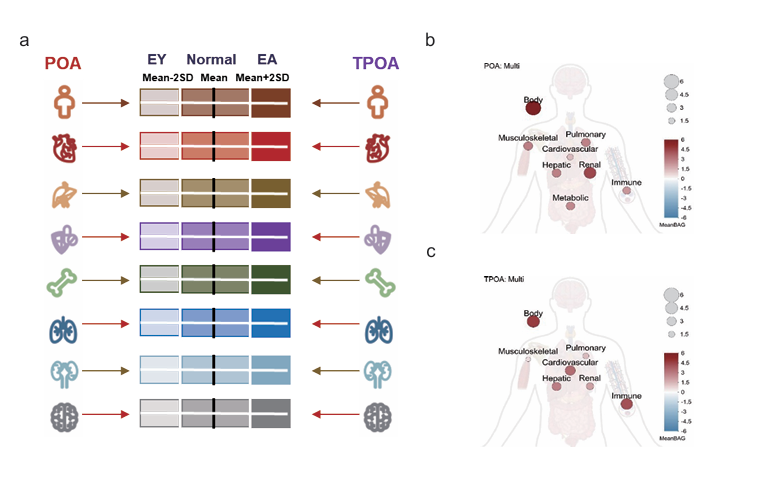


**Supplementary Fig. 3 Organ Aging Classification** (a) Schematic illustration of the definition of extreme organ aging phenotypes based on POA and TPOA; (b) Mean age gaps for multi-organ agers clusters derived from POA-based analysis; (c) Mean age gaps for multi-organ agers clusters derived from TPOA-based analysis.

Literature Review on previously published Proteome Aging Clock

| **Journal** | **Title** | **Proteomic profiling** | **Cohort Size** | **Num.Proteins contained** | **Performance** |
| --- | --- | --- | --- | --- | --- |
| ACEL 2018 | Plasma proteomic signature of age in healthy humans2 | SomaScan | 240 | 76 | r=0.94 |
| ACEL 2020 | Data mining of human plasma proteins generates a multitude of highly predictive aging clocks that reflect different aspects of aging 3 | SomaScan | 4263 | 491 | r=0.96 |
| NatMed 2019 | Undulating changes in human plasma proteome profiles across the lifespan4 | SomaScan | 4263 | 373 | r=0.93 |
| NatMed 2024 | Proteomic aging clock predicts mortality and risk of common age-related diseases in diverse populations 5 | Olink | UKB/CKB/Finn | 204 | r=0.94 |

1. Oh, H.S.-H. *et al.* Organ aging signatures in the plasma proteome track health and disease. *Nature* **624**, 164-172 (2023).

2. Tanaka, T. *et al.* Plasma proteomic signature of age in healthy humans. *Aging Cell* **17**, e12799 (2018).

3. Lehallier, B., Shokhirev, M.N., Wyss-Coray, T. & Johnson, A.A. Data mining of human plasma proteins generates a multitude of highly predictive aging clocks that reflect different aspects of aging. *Aging Cell* **19**, e13256 (2020).

4. Lehallier, B. *et al.* Undulating changes in human plasma proteome profiles across the lifespan. *Nat Med* **25**, 1843-1850 (2019).

5. Argentieri, M.A. *et al.* Proteomic aging clock predicts mortality and risk of common age-related diseases in diverse populations. *Nat Med* **30**, 2450-2460 (2024).
