# Supplementary material for: Organ Function-Derived Protein Clocks Demonstrate Enhanced Prediction of Organ-Specific Disease and Mortality Risk
Source: Research Square preprint supplement (doi:10.21203/rs.3.rs-6273836/v1), 2025-04-29
Supplement: Supplementary file 2 [file a382b52e05e49f1829056c3e.xlsx]

## Sheet: Contents
Supplementary Tables
	Title
Supplementary Table 1	Demographic details of individuals comprising different clinical groups
Supplementary Table 2	Comparison of machine learning models for protein clock prediction
Supplementary Table 3	Model performance of each aging clock
Supplementary Table 4	Top 10 indicators in full POA clock
Supplementary Table 5	Association between BAG (BA-based) and biological frailty indicators
Supplementary Table 6	Association between BAG (POA-based) and biological frailty indicators
Supplementary Table 7	Association between BAG (BA-based) and Disease Stauts
Supplementary Table 8	Association between BAG (POA-based) and Disease Stauts
Supplementary Table 9	Chronic disease risk estimates of organ age gaps (BA-based)
Supplementary Table 10	Chronic disease risk estimates of organ age gaps (POA-based)
Supplementary Table 11	Protein related to death risk
Supplementary Table 12	Associations between age-related biological, physical and cognitive function with published biological age gaps / POA- organ age gaps
Supplementary Table 13	Chronic disease risk estimates of published biological age gaps / POA- organ age gaps
Supplementary Table 14	Association between BAG (TPOA-based) and biological frailty indicators
Supplementary Table 15	Association between BAG (TPOA-based) and Disease Status
Supplementary Table 16	Chronic disease risk estimates of organ age gaps (TPOA-based)
Supplementary Table 17	Details for organ-specific aging subtypes (POA and TPOA based)
Supplementary Table 18	Disease incidence risk for mortality and chronic diseases by age subtype(POA and TPOA based)
Supplementary Table 19	Demographic details for NSPT (East Asia Cohort)
Supplementary Table 20	Chronic disease risk estimates of published TPOM/BA-, POA- ,TPOA- organ age gaps
Supplementary Table 21	Proteins contained in reduced POA clock
Supplementary Table 22	Model performance for reduced POA clock
Supplementary Table 23	Association between BAG (reduced and full model) and biological frailty indicators
Supplementary Table 24	Chronic disease risk estimates of organ age gaps (Reduced POA-based)
Supplementary Table 25	Tissue-specific proteins contained in TPOA clock

## Sheet: ST1.UKBB Demographic details
Supplementary Table 1. Demographic details of individuals comprising different clinical groups.
NatMed2023-TIAN：Heterogeneous aging across multiple organ systems and prediction of chronic disease and mortality
Prodromal illness stage(disease onset during follow-up）
	Body				Brain
Group	Sample size	Age (mean, years)	Age (std, years)	Male (%)	Sample size	Age (mean, years)	Age (std, years)	Male (%)
Bipolar_disorder	18	56.7222	9.13819	66.6667
Cirrhosis	92	60.0217	7.73031	58.6957
CKD	833	62.0084	6.39871	52.581	5	66	10.6066	80
COPD	596	61.5369	6.42189	57.7181	2	52.5	0.707107	50
Dementia	339	64.4454	5.26733	55.7522
Depression	628	56.9347	8.71655	40.7643	9	57.375	6.32314	22.2222
Diabetes	907	59.4851	7.3909	57.8831	7	62.5714	9.84644	57.1429
Hypertensive_diseases	1879	59.0138	7.65447	51.3571	17	59.5	6.84105	64.7059
Ischemic_heart_disease	1090	60.7193	6.76281	63.4862	4	69.5	5.32291	100
Multiple_Sclerosis	37	52.6216	8.56138	27.027
Osteoarthritis	1864	58.9823	7.47831	40.5579	11	62.0909	6.97789	72.7273
Osteoporosis	34	53.8824	6.18779	11.7647
Parkinsonism	215	62.8744	5.38673	64.186
Schizophrenia	33	59.4545	8.70736	54.5455
Stroke	355	61.4507	7.01006	55.2113	1	54	NA	100
All-Cause Mortality	4956	62.2226	6.27344	59.5238
Lifetime diagnosis
	Body				Brain
Group	Sample size	Age (mean, years)	Age (std, years)	Male (%)	Sample size	Age (mean, years)	Age (std, years)	Male (%)
Bipolar_disorder	100	55.18	8.24545	57	2	67	4.24264	50
Cirrhosis	134	59.3731	7.89467	55.2239	3	57.6667	8.0829	66.6667
CKD	1193	61.7678	6.55121	51.7184	13	63.0769	7.82583	61.5385
COPD	1030	61.0835	6.54645	58.1553	14	62.3571	8.23321	57.1429
Dementia	358	64.4106	5.31228	55.5866
Depression	2431	55.3126	8.12688	36.5282	160	58.1313	6.10508	35
Diabetes	1542	59.5363	7.3133	61.3489	45	62.2	8.20366	77.7778
Hypertensive_diseases	7320	59.2689	7.34387	54.5492	263	61.8289	7.7305	61.2167
Ischemic_heart_disease	2206	61.1886	6.49596	67.2711	55	64.3818	7.69918	74.5455
Multiple_Sclerosis	248	53.629	7.81462	30.2419	5	58.8	8.92749	60
Osteoarthritis	4569	59.5386	7.01405	40.8623	166	61.8795	7.26452	44.5783
osteoporosis	397	60.6474	6.39615	11.0831	19	62.8947	7.88736	21.0526
Parkinsonism	299	62.3612	5.59991	64.5485
Schizophrenia	79	55.4684	9.02537	56.962	2	54	1.41421	100
Stroke	683	61.0322	6.92897	57.6867	18	61.8889	8.3447	83.3333
NatMed2024-Argentieri：Proteomic aging clock predicts mortality and risk of common age-related diseases in diverse populations
Prodromal illness stage(disease onset during follow-up）
	Body				Brain
Group	Sample size	Age (mean, years)	Age (std, years)	Male (%)	Sample size	Age (mean, years)	Age (std, years)	Male (%)
Allcause_dementia	379	64.1187	5.42716	56.7282
Alzheimer	150	64.7	5.81453	48.6667
Cerebrovascular_diseases	586	62.0358	6.82582	54.7782	5	56.4	2.30217	100
Chronic_kidney_diseases	784	62.4426	6.16187	53.5714	8	64	8.81557	87.5
Chronic_liver_diseases	253	57.4032	8.17926	54.1502	2	50.5	3.53553	100
Emphysema_COPD	633	61.6761	6.40196	56.5561	4	54.25	3.86221	75
Ischemic_heart_disease	1025	60.6985	6.70382	62.2439	13	64.0769	8.46031	76.9231
Macular_degeneration	277	62.9314	5.30439	41.8773	5	64.2	6.64831	40
Osteoarthritis	1771	59.0819	7.438	40.4291	40	59.9	7.45517	50
Osteoporosis	456	60.7741	6.80429	21.2719	8	60.75	5.33854	0
Parkinson_parkinsonism	210	62.9952	5.39404	62.8571
Rheumatoid_arthritis	173	60.9538	6.31058	36.9942	1	65	NA	0
Type_2_diabetes	888	59.6047	7.38659	57.3198	14	62.2857	7.59988	71.4286
Vascular_dementia	57	64.3684	5.86342	63.1579
Lifetime diagnosis
	Body				Brain
Group	Sample size	Age (mean, years)	Age (std, years)	Male (%)	Sample size	Age (mean, years)	Age (std, years)	Male (%)
Allcause_dementia	398	64.0678	5.48944	56.5327
Alzheimer	162	64.5741	5.88271	49.3827
Cerebrovascular_diseases	939	61.5272	6.81026	57.082	16	62.375	7.67572	81.25
Chronic_kidney_diseases	909	61.9494	6.56245	53.9054	11	62.5455	8.00454	72.7273
Chronic_liver_diseases	360	57.4222	7.90822	54.7222	6	58.5	8.75785	83.3333
Emphysema_COPD	852	61.5282	6.32459	57.6291	10	63.2	9.56614	60
Ischemic_heart_disease	2137	61.1956	6.46201	66.7759	48	64.6667	7.84242	75
Macular_degeneration	366	62.9399	5.25427	42.8962	11	65.6364	6.0543	27.2727
Osteoarthritis	4067	59.4836	7.03672	40.5704	144	61.9236	7.54018	43.0556
Osteoporosis	905	60.9856	6.42647	18.5635	22	64.2273	6.94147	27.2727
Parkinson_parkinsonism	289	62.4844	5.53404	64.0138
Rheumatoid_arthritis	409	59.6944	7.09992	31.7848
Type_2_diabetes	1478	59.5866	7.34554	61.1637	41	63	7.95613	78.0488
Vascular_dementia	67	64.1045	6.04562	62.6866
CellMetab2025- Goeminne: Plasma protein-based organ-specific aging and mortality models unveil diseases as accelerated aging of organismal systems
Prodromal illness stage(disease onset during follow-up）
	Body				Brain
Group	Sample size	Age (mean, years)	Age (std, years)	Male (%)	Sample size	Age (mean, years)	Age (std, years)	Male (%)
Heart_failure	560	62.5732	5.91759	63.3929	2	59	8.48528	100
Stroke	105	62.4952	7.06579	50.4762	3	57.3333	2.51661	100
COPD	559	61.5707	6.39177	57.6029	5	56.2	5.49545	60
Type_2_diabetes	907	59.4851	7.3909	57.8831	15	63.2667	8.25025	66.6667
Liver_cirrhosis	69	60.3913	7.49552	59.4203	1	53	NA	100
Dementia	318	64.5472	5.11594	55.9748
Kidney_failure	1260	61.6611	6.65848	54.5238	14	65.1429	7.88238	78.5714
Myocardial_infarction	384	60.7682	7.20827	68.2292	6	65.5	3.88587	66.6667
Hypertension	1805	58.8443	7.69503	51.1911	38	60.6316	7.62081	57.8947
Lifetime diagnosis
	Body				Brain
Group	Sample size	Age (mean, years)	Age (std, years)	Male (%)	Sample size	Age (mean, years)	Age (std, years)	Male (%)
Heart_failure	731	62.2517	6.11395	66.3475	3	59.6667	6.1101	66.6667
Stroke	398	61.1935	6.9264	59.0452	11	63.4545	8.69901	90.9091
COPD	976	61.0635	6.55283	57.7869	14	62.3571	8.23321	57.1429
Type_2_diabetes	1542	59.5363	7.3133	61.3489	41	63	7.95613	78.0488
Liver_cirrhosis	107	59.6355	7.57776	56.0748	2	60	9.89949	100
Dementia	337	64.5045	5.17441	55.7864
Kidney_failure	1709	61.3991	6.79698	54.1252	22	63.0455	7.71194	63.6364
Myocardial_infarction	869	61.0575	6.72665	74.9137	26	65.0385	6.98273	73.0769
Hypertension	7190	59.2238	7.35327	54.4367	247	61.7287	7.80265	60.7287

## Sheet: ST2.ML selection
Supplementary Table 2. Comparison of machine learning models for protein clock prediction
		Body	Cardiovascular	Hepatic	Immune	Metabolic	Musculoskeletal	Pulmonary	Renal
SVM	MAE	2.98564	2.54581	2.00605	1.91461	1.87994	2.7468	2.67769	2.31681
	MSE	14.4428	11.2912	6.7701	6.12168	6.29615	11.9091	11.8672	8.98199
	R²	0.640894	0.251942	0.459044	0.34875	0.511529	0.359019	0.329398	0.579399
	RMSE	3.80037	3.36024	2.60194	2.4742	2.50921	3.45095	3.44488	2.997
Lasso	MAE	3.07625	2.59464	2.23585	2.07231	2.17841	2.81267	2.71138	2.4353
	MSE	15.1373	11.6865	8.38156	7.12893	8.05926	12.5227	12.0661	10.1789
	R²	0.623626	0.225754	0.330283	0.241595	0.374742	0.325988	0.318158	0.523351
	RMSE	3.89067	3.41855	2.89509	2.67001	2.83888	3.53875	3.47363	3.19044
RandomForest	MAE	3.42365	2.93633	2.13646	2.2742	2.53559	2.8532	2.09085	2.68969
	MSE	18.6101	13.5992	8.12969	8.61864	10.4923	13.3669	7.21309	12.5003
	R²	0.537278	0.268052	0.369278	0.31134	0.508677	0.244652	0.232642	0.171842
	RMSE	4.31394	3.6877	2.85126	2.93575	3.23917	3.65608	2.68572	3.53557
Ridge	MAE	2.9837	2.54489	2.15524	2.0124	2.10654	2.74892	2.65456	2.35088
	MSE	14.3151	11.1123	7.78955	6.65776	7.47044	12.001	11.5974	9.4202
	R²	0.64407	0.263794	0.377587	0.29172	0.420424	0.354071	0.344644	0.558879
	RMSE	3.78352	3.33351	2.79098	2.58026	2.73321	3.46424	3.4055	3.06923
XGBoost	MAE	2.5685	1.99752	1.92488	2.76305	2.70422	2.29984	1.83731	2.99642
	MSE	11.418	6.66376	6.1425	12.0352	12.0506	8.75612	5.98385	14.3512
	R²	0.243544	0.467542	0.346535	0.352227	0.319034	0.589976	0.535758	0.643172
	RMSE	3.37905	2.58143	2.47841	3.46918	3.4714	2.95907	2.44619	3.7883

## Sheet: ST3.Model Performance
Supplementary Table 3. Model performance of each aging clock
Method	Organ	Female								Male
		Train				Test				Train				Test
		MAE	MSE	R²	RMSE	MAE	MSE	R²	RMSE	MAE	MSE	R²	RMSE	MAE	MSE	R²	RMSE
BA	Body	3.17999	16.3132	0.593356	4.03896	3.19968	16.4727	0.591211	4.05865	3.32353	17.804	0.509894	4.21948	3.33539	18.0185	0.507539	4.24482
	Cardiovascular	2.75604	12.9334	0.221179	3.59631	2.84644	13.7415	0.209887	3.70695	2.35248	9.47536	0.142409	3.07821	2.34001	9.36172	0.13917	3.05969
	Hepatic	2.54489	11.2724	0.147901	3.35744	2.51439	10.8903	0.145715	3.30005	2.32037	9.06676	0.0987999	3.01111	2.39869	9.75995	0.0931104	3.12409
	Immune	1.92787	6.08195	0.0609838	2.46616	1.92426	6.0757	0.0610012	2.46489	2.42056	9.64152	0.118509	3.10508	2.42846	9.77385	0.115712	3.12632
	Metabolic	2.73139	13.1086	0.170544	3.62058	2.85412	14.2228	0.171232	3.77131	1.85825	6.1378	0.0676818	2.47746	1.85764	6.19928	0.0708895	2.48984
	Musculoskeletal	3.08518	15.1111	0.24604	3.8873	3.0443	14.6651	0.247867	3.82951	2.88738	13.2557	0.177577	3.64084	2.91721	13.4885	0.179821	3.67267
	Pulmonary	3.06817	15.5871	0.220478	3.94804	2.99424	14.8227	0.218298	3.85003	2.83535	13.2104	0.167679	3.63462	2.71294	12.0935	0.16935	3.47758
	Renal	3.05124	15.6724	0.266083	3.95884	3.01457	15.3109	0.268562	3.91291	2.87052	13.7534	0.211819	3.70856	2.82942	13.4432	0.209637	3.6665
	Brain	3.16332	15.7803	0.723367	3.97172	3.14562	15.4299	0.728018	3.92809	3.27569	16.8139	0.728439	4.0996	3.20245	16.1129	0.72521	4.01409
	GrayMatter	3.73402	21.9169	0.612233	4.68071	3.71525	21.7344	0.614309	4.66202	3.73169	21.8899	0.643298	4.67771	3.68496	21.2015	0.636748	4.60451
	WhiteMatter	4.10855	26.4573	0.531893	5.14311	4.09907	26.3175	0.533276	5.13006	4.28675	28.9771	0.527599	5.38206	4.27183	28.8057	0.510603	5.36709
	FC-MRI	4.68061	32.9933	0.424211	5.74338	4.67023	32.9065	0.420748	5.73642	5.08165	39.1451	0.373921	6.25617	4.9171	36.5072	0.383629	6.04212
POA	Body	2.98212	14.3637	0.653663	3.78966	2.95691	14.3786	0.650291	3.79191	3.07086	15.1735	0.607231	3.89486	3.06736	15.3152	0.602316	3.91346
	Cardiovascular	2.80158	13.4105	0.240432	3.66183	2.8047	13.5348	0.23774	3.67897	2.29134	9.12972	0.167481	3.0211	2.33039	9.61091	0.175271	3.10015
	Hepatic	2.01364	6.99277	0.476525	2.64406	1.96397	6.56262	0.491856	2.56176	1.86071	5.76286	0.470844	2.40027	1.86118	5.78507	0.454715	2.40522
	Immune	1.62043	4.29082	0.352651	2.07125	1.64611	4.34554	0.345945	2.0846	2.01584	6.66423	0.432622	2.58108	2.0297	6.61244	0.459968	2.57147
	Metabolic	2.10583	8.04166	0.546617	2.83553	2.05709	7.61257	0.56458	2.75909	1.36349	3.39402	0.508619	1.84174	1.34485	3.34719	0.524893	1.82953
	Musculoskeletal	2.665	11.3115	0.432113	3.36284	2.62465	10.9448	0.44336	3.30829	2.78113	12.2629	0.263494	3.50168	2.78048	12.2374	0.254152	3.4982
	Pulmonary	2.83979	13.3239	0.320147	3.65008	2.80941	13.0085	0.315942	3.60673	2.52724	10.5008	0.304072	3.24047	2.50494	10.347	0.302168	3.21667
	Renal	2.33693	9.20052	0.593688	3.03305	2.34877	9.42415	0.580238	3.06988	2.30259	8.69241	0.536273	2.94819	2.28365	8.60428	0.545461	2.9333
	Brain	3.18826	16.5821	0.400017	4.04812	3.3444	17.9386	0.344945	4.2354	3.67133	21.5474	0.461703	4.62284	3.35666	17.1315	0.466735	4.13903
	GrayMatter	3.19391	16.5348	0.293391	4.05423	3.27098	16.8327	0.293836	4.10276	3.72027	21.5268	0.405561	4.62261	3.55484	18.3719	0.40898	4.28625
	WhiteMatter	3.22616	17.0243	0.276225	4.07418	3.39212	20.6082	0.142769	4.53963	3.9199	23.9625	0.332278	4.87707	3.80547	22.3113	0.296895	4.72348
	FC-MRI	2.97459	13.3854	0.211673	3.63976	2.84853	13.0043	0.184739	3.60615	2.94419	13.9122	0.169519	3.7129	2.67848	10.9241	0.213907	3.30516
TPOA	Body	2.86584	13.0281	0.801206	3.60943	2.87148	13.053	0.80327	3.61288	3.05992	14.6182	0.789889	3.82336	3.04967	14.5569	0.787556	3.81532
	Cardiovascular	5.71421	47.6264	0.273275	6.90119	5.67551	47.07	0.290578	6.86076	6.1625	54.2434	0.220346	7.36501	6.18955	55.0458	0.196658	7.41928
	Hepatic	6.16834	54.2823	0.171714	7.36765	6.19902	54.5489	0.17786	7.38572	6.45684	58.9913	0.152104	7.68058	6.44149	59.327	0.134177	7.7024
	Immune	5.68877	47.2585	0.27889	6.87448	5.66844	46.8444	0.293979	6.84429	6.10319	53.5263	0.230652	7.31617	6.03373	52.3519	0.235972	7.23546
	Musculoskeletal	6.80383	63.8338	0.0259704	7.9896	6.86578	64.5385	0.0273003	8.03358	7.0538	68.0689	0.0216288	8.25039	6.95485	66.6124	0.0278545	8.16164
	Pulmonary	6.68646	62.0499	0.0531892	7.87718	6.72147	62.1694	0.0630061	7.88476	7.01111	67.4344	0.0307483	8.21184	6.94651	66.3485	0.0317066	8.14546
	Renal	6.88733	64.3377	0.0182807	8.06677	6.88733	65.0727	0.0192482	8.06677	6.98825	67.1539	0.0347794	8.19475	6.90528	66.0591	0.0359301	8.12767
	Brain	4.77292	35.6419	0.190206	5.96964	5.45428	41.4773	0.227858	6.43925	5.75634	48.5108	0.214086	6.9645	5.74243	51.8547	0.240892	7.19905

## Sheet: ST4.Top indicators
Supplementary Table 4. Top 10 indicators in full POA clock
Organ	GeneName	SHAP value
Body	CST3	0.42957
Body	LTBP2	0.265694
Body	GDF15	0.1974
Body	IGFBP3	0.192346
Body	AGER	0.190053
Body	EFEMP1	0.167532
Body	FAP	0.162583
Body	CHGB	0.1539
Body	ART3	0.148855
Body	ADM	0.14434
Cardiovascular	CHGB	0.226225
Cardiovascular	FAP	0.166114
Cardiovascular	LTBP2	0.125026
Cardiovascular	TGFBR3	0.12095
Cardiovascular	AGER	0.112744
Cardiovascular	LSP1	0.105653
Cardiovascular	COL6A3	0.102394
Cardiovascular	ACTA2	0.101725
Cardiovascular	TNFRSF11B	0.0914056
Cardiovascular	HAVCR1	0.0836375
Hepatic	COL1A1	0.175881
Hepatic	CPM	0.153257
Hepatic	OMD	0.121941
Hepatic	DCXR	0.119458
Hepatic	SPP1	0.108326
Hepatic	AHCY	0.107549
Hepatic	FABP5	0.10697
Hepatic	ITIH3	0.0963287
Hepatic	PTPRF	0.0950892
Hepatic	IGFBP2	0.0940672
Immune	SDC4	0.183309
Immune	GP1BA	0.124369
Immune	LILRA5	0.118256
Immune	THPO	0.0859645
Immune	FLT3LG	0.0818357
Immune	CD300E	0.0777189
Immune	CLEC6A	0.075444
Immune	VCAN	0.0734414
Immune	KEL	0.0723466
Immune	JAM2	0.0696545
Metabolic	PLTP	0.192358
Metabolic	AHSP	0.158986
Metabolic	PPME1	0.139739
Metabolic	CD99	0.118413
Metabolic	NPY	0.110517
Metabolic	GDF15	0.107038
Metabolic	DAG1	0.105729
Metabolic	PCSK9	0.103168
Metabolic	LEP	0.10205
Metabolic	HMBS	0.0978623
Musculoskeletal	COMP	0.133199
Musculoskeletal	ART3	0.130709
Musculoskeletal	NPPC	0.129046
Musculoskeletal	CD38	0.122065
Musculoskeletal	COL1A1	0.117723
Musculoskeletal	L1CAM	0.116939
Musculoskeletal	SPINK6	0.109628
Musculoskeletal	OMG	0.100075
Musculoskeletal	ANGPTL3	0.099571
Musculoskeletal	DNER	0.0982229
Pulmonary	AGER	0.188508
Pulmonary	SCGB1A1	0.186991
Pulmonary	CCDC80	0.170664
Pulmonary	SEZ6L	0.127191
Pulmonary	FAP	0.115631
Pulmonary	GDF15	0.106794
Pulmonary	EFEMP1	0.105991
Pulmonary	NEFL	0.103874
Pulmonary	PTGDS	0.102636
Pulmonary	BPIFB1	0.10097
Renal	CST3	1.16507
Renal	FGF21	0.213033
Renal	IGFBP2	0.163376
Renal	STC1	0.160087
Renal	IGFBP4	0.130588
Renal	NFASC	0.121742
Renal	ART3	0.113397
Renal	CD38	0.111926
Renal	LPL	0.10632
Renal	TIMP1	0.106315

## Sheet: ST5.BA.with.frailty
Supplementary Table 5. Association between BAG (BA-based) and biological frailty indicators
ClockType	Organ	Status	Beta	Beta_SE	Z_score	P_Value
BA	Body	FrailtyIndex	0.121683	0.0050582	24.0565	7.4272e-127
BA	Body	telomere_length	-0.0290057	0.00489597	-5.92441	3.15941e-09
BA	Body	father_lifespan	-0.0280918	0.005757	-4.8796	1.06842e-06
BA	Body	mother_lifespan	-0.0455765	0.00619342	-7.35885	1.91286e-13
BA	Body	self_rated_health	0.125606	0.00463157	27.1195	1.40137e-160
BA	Body	perceived_age	0.0196785	0.00485957	4.04943	5.14339e-05
BA	Body	HealthSpan	-0.0307136	0.00389966	-7.87598	3.46547e-15
BA	Body	DeathSpan	-0.0243941	0.00687521	-3.54813	0.000392758
BA	Cardiovascular	FrailtyIndex	-0.00747125	0.00507741	-1.47147	0.141173
BA	Cardiovascular	telomere_length	0.0011649	0.00488103	0.238659	0.811371
BA	Cardiovascular	father_lifespan	-0.0102003	0.00558911	-1.82503	0.0680065
BA	Cardiovascular	mother_lifespan	-0.0252287	0.0058934	-4.28084	1.8689e-05
BA	Cardiovascular	self_rated_health	0.0125877	0.00465923	2.70168	0.00690176
BA	Cardiovascular	perceived_age	-0.00899137	0.00484774	-1.85476	0.063638
BA	Cardiovascular	HealthSpan	0.000546981	0.0038831	0.140862	0.88798
BA	Cardiovascular	DeathSpan	0.000994699	0.00679074	0.146479	0.883551
BA	Hepatic	FrailtyIndex	0.0451218	0.00502518	8.97915	2.8595e-19
BA	Hepatic	telomere_length	-0.00775413	0.00483299	-1.60442	0.10863
BA	Hepatic	father_lifespan	-0.013825	0.0057667	-2.39738	0.016519
BA	Hepatic	mother_lifespan	-0.0174753	0.00621193	-2.81318	0.00490924
BA	Hepatic	self_rated_health	0.0432826	0.00460937	9.39012	6.28278e-21
BA	Hepatic	perceived_age	0.0158541	0.00479986	3.30304	0.00095723
BA	Hepatic	HealthSpan	-0.0110609	0.00386182	-2.86417	0.00418317
BA	Hepatic	DeathSpan	-0.0281175	0.00744043	-3.77901	0.000159915
BA	Immune	FrailtyIndex	0.0629296	0.00506058	12.4352	1.99431e-35
BA	Immune	telomere_length	-0.0323027	0.00490208	-6.58958	4.4645e-11
BA	Immune	father_lifespan	-0.0104246	0.0057762	-1.80475	0.0711235
BA	Immune	mother_lifespan	-0.0174849	0.00620286	-2.81884	0.0048236
BA	Immune	self_rated_health	0.0708324	0.00465872	15.2042	4.56011e-52
BA	Immune	perceived_age	0.0155843	0.00485954	3.20695	0.0013425
BA	Immune	HealthSpan	-0.0165287	0.00390374	-4.23407	2.3001e-05
BA	Immune	DeathSpan	-0.0404896	0.00673752	-6.00957	2.03876e-09
BA	Metabolic	FrailtyIndex	0.108888	0.00510526	21.3286	2.63186e-100
BA	Metabolic	telomere_length	-0.0169368	0.00490488	-3.45306	0.000554829
BA	Metabolic	father_lifespan	-0.0246747	0.00577323	-4.27398	1.92602e-05
BA	Metabolic	mother_lifespan	-0.0210182	0.0061716	-3.40564	0.000661152
BA	Metabolic	self_rated_health	0.0936204	0.0046653	20.0674	3.725e-89
BA	Metabolic	perceived_age	0.0118762	0.00487654	2.43538	0.0148802
BA	Metabolic	HealthSpan	-0.0139777	0.00390795	-3.57675	0.000348307
BA	Metabolic	DeathSpan	0.00161948	0.0075663	0.214039	0.830528
BA	Musculoskeletal	FrailtyIndex	0.145925	0.00507633	28.7461	1.17042e-179
BA	Musculoskeletal	telomere_length	-0.0138501	0.00492579	-2.81176	0.00492947
BA	Musculoskeletal	father_lifespan	-0.0317164	0.0058626	-5.40995	6.3522e-08
BA	Musculoskeletal	mother_lifespan	-0.0402054	0.00634496	-6.33659	2.38954e-10
BA	Musculoskeletal	self_rated_health	0.137763	0.00465527	29.5929	1.66643e-190
BA	Musculoskeletal	perceived_age	0.0228747	0.00489215	4.6758	2.93713e-06
BA	Musculoskeletal	HealthSpan	-0.0244116	0.00393759	-6.19964	5.71426e-10
BA	Musculoskeletal	DeathSpan	-0.0130963	0.00770845	-1.69896	0.0894105
BA	Pulmonary	FrailtyIndex	0.138048	0.00518501	26.6244	1.17827e-154
BA	Pulmonary	telomere_length	-0.029301	0.0050441	-5.80897	6.33247e-09
BA	Pulmonary	father_lifespan	-0.0403258	0.00604458	-6.67139	2.57765e-11
BA	Pulmonary	mother_lifespan	-0.0520938	0.00657095	-7.92789	2.32261e-15
BA	Pulmonary	self_rated_health	0.131667	0.00477074	27.5989	3.48567e-166
BA	Pulmonary	perceived_age	0.0162578	0.00500747	3.24671	0.00116838
BA	Pulmonary	HealthSpan	-0.024181	0.0040388	-5.98717	2.15341e-09
BA	Pulmonary	DeathSpan	-0.011751	0.00825749	-1.42307	0.154798
BA	Renal	FrailtyIndex	0.10783	0.00510958	21.1036	2.96553e-98
BA	Renal	telomere_length	-0.0187567	0.00493041	-3.80429	0.000142419
BA	Renal	father_lifespan	-0.014238	0.00576608	-2.46927	0.0135442
BA	Renal	mother_lifespan	-0.0314241	0.00613751	-5.12001	3.07811e-07
BA	Renal	self_rated_health	0.102253	0.00467559	21.8695	1.96367e-105
BA	Renal	perceived_age	0.018823	0.00489107	3.84844	0.000119048
BA	Renal	HealthSpan	-0.0282115	0.00391444	-7.20702	5.81955e-13
BA	Renal	DeathSpan	-0.0116347	0.00670135	-1.73617	0.0826158
BA	Brain	DeathSpan	NA	NA	NA	NA
BA	Brain	FrailtyIndex	0.0664748	0.0376319	1.76645	0.0777935
BA	Brain	telomere_length	-0.0251982	0.0342215	-0.736328	0.46174
BA	Brain	father_lifespan	-0.0551152	0.0487723	-1.13005	0.259126
BA	Brain	mother_lifespan	-0.000361273	0.049154	-0.00734981	0.99414
BA	Brain	self_rated_health	0.0214224	0.0335254	0.638989	0.523
BA	Brain	perceived_age	-0.0252626	0.0335104	-0.753874	0.451131
BA	Brain	HealthSpan	-0.0235267	0.030439	-0.772914	0.439803
BA	FC	DeathSpan	NA	NA	NA	NA
BA	FC	father_lifespan	0.0159262	0.0499812	0.318644	0.750161
BA	FC	FrailtyIndex	0.0683063	0.0372489	1.83378	0.0671476
BA	FC	HealthSpan	-0.0265258	0.0302315	-0.877421	0.380523
BA	FC	mother_lifespan	0.0813699	0.0505798	1.60874	0.10858
BA	FC	perceived_age	0.00696546	0.0336217	0.207172	0.835925
BA	FC	self_rated_health	0.0500521	0.0335913	1.49003	0.136581
BA	FC	telomere_length	-0.0172124	0.0344564	-0.499541	0.617531
BA	GM	DeathSpan	NA	NA	NA	NA
BA	GM	father_lifespan	-0.0566565	0.0503004	-1.12636	0.260681
BA	GM	FrailtyIndex	0.0633608	0.0384902	1.64615	0.100219
BA	GM	HealthSpan	0.0209529	0.0310105	0.67567	0.499447
BA	GM	mother_lifespan	-0.0712849	0.0503533	-1.41569	0.157759
BA	GM	perceived_age	-0.0182832	0.0339831	-0.538008	0.59071
BA	GM	self_rated_health	-0.0111464	0.0339988	-0.327847	0.743107
BA	GM	telomere_length	0.0279111	0.0346597	0.80529	0.420884
BA	WM	DeathSpan	NA	NA	NA	NA
BA	WM	father_lifespan	0.0176567	0.0520439	0.339266	0.734586
BA	WM	FrailtyIndex	0.0691707	0.038336	1.80433	0.0716459
BA	WM	HealthSpan	0.000549253	0.0308171	0.017823	0.985785
BA	WM	mother_lifespan	0.0129133	0.0487026	0.265147	0.791053
BA	WM	perceived_age	-0.0225763	0.0336953	-0.670012	0.503029
BA	WM	self_rated_health	0.0367203	0.0336929	1.08985	0.276082
BA	WM	telomere_length	-0.00890271	0.0348792	-0.255244	0.798598
Notes: Bdoy Sample Size:52072; Brain Sample Size:1072
FC: functional connectivity; GM: gray matter; WM: white matter

## Sheet: ST6.POA.with.frailty
Supplementary Table 6. Association between BAG (POA-based) and biological frailty indicators
ClockType	Organ	Status	Beta	Beta_SE	Z_score	P_Value
POA	Body	FrailtyIndex	0.152695	0.00505717	30.1938	9.14829e-198
POA	Body	telomere_length	-0.0551126	0.00492639	-11.1872	5.19209e-29
POA	Body	father_lifespan	-0.0323648	0.00595481	-5.43507	5.51996e-08
POA	Body	mother_lifespan	-0.0405546	0.00642718	-6.30986	2.84024e-10
POA	Body	self_rated_health	0.154096	0.00464702	33.1602	4.7658e-238
POA	Body	perceived_age	0.0348221	0.0048954	7.11324	1.15152e-12
POA	Body	HealthSpan	-0.0219249	0.0039388	-5.56639	2.61735e-08
POA	Body	DeathSpan	-0.0261971	0.00736574	-3.55662	0.000380329
POA	Cardiovascular	FrailtyIndex	0.0735916	0.00536651	13.7131	1.08918e-42
POA	Cardiovascular	telomere_length	-0.0265876	0.00518478	-5.12801	2.9416e-07
POA	Cardiovascular	father_lifespan	-0.0145054	0.00619948	-2.33977	0.0193021
POA	Cardiovascular	mother_lifespan	-0.0311461	0.00665426	-4.68062	2.87521e-06
POA	Cardiovascular	self_rated_health	0.0773323	0.00493492	15.6704	3.45284e-55
POA	Cardiovascular	perceived_age	0.021032	0.00514845	4.08511	4.41378e-05
POA	Cardiovascular	HealthSpan	0.000674086	0.00414533	0.162614	0.870824
POA	Cardiovascular	DeathSpan	0.00392151	0.00868592	0.451479	0.651671
POA	Hepatic	FrailtyIndex	0.0586912	0.00526783	11.1414	8.80151e-29
POA	Hepatic	telomere_length	-0.0249558	0.00508516	-4.90757	9.25696e-07
POA	Hepatic	father_lifespan	-0.0185419	0.00611134	-3.03402	0.00241525
POA	Hepatic	mother_lifespan	-0.0161658	0.00660762	-2.44653	0.0144308
POA	Hepatic	self_rated_health	0.0584907	0.00484348	12.0762	1.6036e-33
POA	Hepatic	perceived_age	0.0210881	0.00504751	4.17792	2.94783e-05
POA	Hepatic	HealthSpan	-0.0114139	0.00406572	-2.80735	0.00499744
POA	Hepatic	DeathSpan	-0.0393182	0.00840546	-4.6777	3.00401e-06
POA	Immune	FrailtyIndex	0.0910865	0.00521756	17.4577	5.79274e-68
POA	Immune	telomere_length	-0.0559772	0.00504327	-11.0994	1.38806e-28
POA	Immune	father_lifespan	-0.0205205	0.00598777	-3.42707	0.000610944
POA	Immune	mother_lifespan	-0.0227229	0.00641299	-3.54326	0.000395937
POA	Immune	self_rated_health	0.109049	0.00479075	22.7623	5.30165e-114
POA	Immune	perceived_age	0.0204024	0.0050145	4.06868	4.73662e-05
POA	Immune	HealthSpan	-0.0292386	0.00402949	-7.25615	4.05472e-13
POA	Immune	DeathSpan	-0.0392969	0.00721095	-5.44961	5.37494e-08
POA	Metabolic	FrailtyIndex	0.125586	0.00526211	23.8661	6.67386e-125
POA	Metabolic	telomere_length	-0.0141121	0.00509471	-2.76995	0.00560911
POA	Metabolic	father_lifespan	-0.0280194	0.00611246	-4.58398	4.58032e-06
POA	Metabolic	mother_lifespan	-0.0298906	0.00656927	-4.55006	5.38847e-06
POA	Metabolic	self_rated_health	0.106317	0.00483271	21.9996	1.16396e-106
POA	Metabolic	perceived_age	0.0227447	0.00505585	4.49869	6.85554e-06
POA	Metabolic	HealthSpan	-0.00875303	0.00405907	-2.15641	0.0310574
POA	Metabolic	DeathSpan	0.00936742	0.00879807	1.06471	0.287075
POA	Musculoskeletal	FrailtyIndex	0.196907	0.00513825	38.3217	0
POA	Musculoskeletal	telomere_length	-0.0471683	0.00506478	-9.31301	1.30269e-20
POA	Musculoskeletal	father_lifespan	-0.0516559	0.00617564	-8.36445	6.29642e-17
POA	Musculoskeletal	mother_lifespan	-0.0578411	0.00673304	-8.59063	9.15166e-18
POA	Musculoskeletal	self_rated_health	0.197882	0.00473307	41.8085	0
POA	Musculoskeletal	perceived_age	0.046841	0.00502124	9.32856	1.12362e-20
POA	Musculoskeletal	HealthSpan	-0.0216591	0.00405526	-5.34098	9.29482e-08
POA	Musculoskeletal	DeathSpan	-0.0254432	0.00907646	-2.80321	0.00508588
POA	Pulmonary	FrailtyIndex	0.245742	0.00556149	44.1864	0
POA	Pulmonary	telomere_length	-0.0707793	0.00549129	-12.8894	6.13045e-38
POA	Pulmonary	father_lifespan	-0.0696527	0.00664335	-10.4846	1.12593e-25
POA	Pulmonary	mother_lifespan	-0.0745086	0.00716626	-10.3971	2.88044e-25
POA	Pulmonary	self_rated_health	0.258048	0.00509464	50.6508	0
POA	Pulmonary	perceived_age	0.0553753	0.00545308	10.1549	3.3618e-24
POA	Pulmonary	HealthSpan	-0.0198087	0.00440246	-4.49945	6.83205e-06
POA	Pulmonary	DeathSpan	-0.0252272	0.00906675	-2.78239	0.00542323
POA	Renal	FrailtyIndex	0.149936	0.00517545	28.9706	2.07148e-182
POA	Renal	telomere_length	-0.0323761	0.0050199	-6.44955	1.13434e-10
POA	Renal	father_lifespan	-0.0239578	0.00587426	-4.07844	4.54547e-05
POA	Renal	mother_lifespan	-0.0292926	0.00624241	-4.69252	2.7131e-06
POA	Renal	self_rated_health	0.137222	0.00474562	28.9154	4.65491e-182
POA	Renal	perceived_age	0.0312202	0.00498502	6.26281	3.81757e-10
POA	Renal	HealthSpan	-0.0248133	0.00399726	-6.20758	5.4334e-10
POA	Renal	DeathSpan	-0.0202058	0.00688244	-2.93586	0.00334662
POA	Brain	DeathSpan	NA	NA	NA	NA
POA	Brain	father_lifespan	-0.0627865	0.0526875	-1.19168	0.234087
POA	Brain	FrailtyIndex	0.182161	0.0392388	4.64237	4.17455e-06
POA	Brain	HealthSpan	-0.0517097	0.032258	-1.603	0.109331
POA	Brain	mother_lifespan	-0.0709717	0.0553784	-1.28158	0.200844
POA	Brain	perceived_age	-0.0544227	0.0350854	-1.55115	0.121232
POA	Brain	self_rated_health	0.0692968	0.0350675	1.9761	0.048462
POA	Brain	telomere_length	-0.116365	0.0362043	-3.21413	0.00135915
POA	FC	DeathSpan	NA	NA	NA	NA
POA	FC	father_lifespan	-0.0544861	0.06248	-0.872058	0.383695
POA	FC	FrailtyIndex	0.181398	0.0465326	3.8983	0.000107007
POA	FC	HealthSpan	-0.03405	0.0377968	-0.900869	0.367931
POA	FC	mother_lifespan	-0.0773407	0.0640821	-1.2069	0.22829
POA	FC	perceived_age	-0.026298	0.0417935	-0.629236	0.529361
POA	FC	self_rated_health	0.0711892	0.0417477	1.70522	0.0885124
POA	FC	telomere_length	-0.0657131	0.0431719	-1.52213	0.128359
POA	GM	DeathSpan	NA	NA	NA	NA
POA	GM	father_lifespan	-0.0637664	0.053453	-1.19294	0.233592
POA	GM	FrailtyIndex	0.167962	0.0393929	4.26375	2.31088e-05
POA	GM	HealthSpan	-0.031061	0.0325039	-0.955607	0.339561
POA	GM	mother_lifespan	-0.0710608	0.0555844	-1.27843	0.20195
POA	GM	perceived_age	-0.0674082	0.035089	-1.92106	0.0550527
POA	GM	self_rated_health	0.0667144	0.0351031	1.90053	0.0576966
POA	GM	telomere_length	-0.10644	0.036039	-2.95346	0.00323139
POA	WM	DeathSpan	NA	NA	NA	NA
POA	WM	father_lifespan	-0.0572583	0.0531598	-1.0771	0.28208
POA	WM	FrailtyIndex	0.16836	0.0413647	4.07014	5.28178e-05
POA	WM	HealthSpan	-0.0371942	0.0330359	-1.12587	0.260559
POA	WM	mother_lifespan	-0.0139462	0.0558704	-0.249617	0.803031
POA	WM	perceived_age	-0.0266788	0.0360616	-0.739811	0.459616
POA	WM	self_rated_health	0.0834057	0.035974	2.3185	0.0206551
POA	WM	telomere_length	-0.126901	0.0369815	-3.43147	0.000630109
Notes: Bdoy Sample Size:52072; Brain Sample Size:1072
FC: functional connectivity; GM: gray matter; WM: white matter

## Sheet: ST7.BA.with.Disease
Supplementary Table 7. Association between BAG (BA-based) and Disease Stauts
ClockType	Organ	Outcome	Beta	Beta_SE	Z_score	P_Value
BA	Body	Bipolar_disorder	0.321865	0.0731418	4.40056	1.07973e-05
BA	Body	Cirrhosis	0.567324	0.100097	5.66772	1.44709e-08
BA	Body	CKD	0.56056	0.0382122	14.6697	1.00852e-48
BA	Body	COPD	0.35528	0.0318889	11.1412	7.9067e-29
BA	Body	Dementia	0.354373	0.151046	2.34614	0.0189692
BA	Body	Depression	0.0645781	0.0178752	3.61273	0.000302993
BA	Body	Diabetes	0.577252	0.0281172	20.5302	1.15658e-93
BA	Body	Hypertensive_diseases	0.29128	0.011679	24.9405	2.70808e-137
BA	Body	Ischemic_heart_disease	0.258462	0.020741	12.4614	1.21254e-35
BA	Body	Multiple_Sclerosis	0.0372386	0.0605748	0.614755	0.538717
BA	Body	Osteoarthritis	0.0718401	0.0151087	4.75489	1.98554e-06
BA	Body	Osteoporosis	0.274287	0.0379473	7.22812	4.89727e-13
BA	Body	Parkinsonism	-0.0136797	0.0865866	-0.157989	0.874466
BA	Body	Schizophrenia	0.240344	0.0843504	2.84935	0.00438083
BA	Body	Stroke	0.289779	0.0356858	8.12028	4.65105e-16
BA	Cardiovascular	Bipolar_disorder	-0.103053	0.0841234	-1.22502	0.220567
BA	Cardiovascular	Cirrhosis	0.0890822	0.104207	0.854855	0.392632
BA	Cardiovascular	CKD	0.062803	0.0367084	1.71086	0.0871063
BA	Cardiovascular	COPD	0.00321673	0.0319753	0.1006	0.919868
BA	Cardiovascular	Dementia	0.0278255	0.146419	0.19004	0.849277
BA	Cardiovascular	Depression	-0.103276	0.0184345	-5.60234	2.11475e-08
BA	Cardiovascular	Diabetes	0.250854	0.0274667	9.13302	6.66138e-20
BA	Cardiovascular	Hypertensive_diseases	0.256041	0.0112104	22.8397	1.84958e-115
BA	Cardiovascular	Ischemic_heart_disease	0.0432987	0.0205662	2.10534	0.0352619
BA	Cardiovascular	Multiple_Sclerosis	-0.0705924	0.0614915	-1.148	0.250967
BA	Cardiovascular	Osteoarthritis	-0.0480347	0.0143533	-3.3466	0.000818087
BA	Cardiovascular	Osteoporosis	-0.0220589	0.0330788	-0.666859	0.504862
BA	Cardiovascular	Parkinsonism	-0.164398	0.0875675	-1.87739	0.0604645
BA	Cardiovascular	Schizophrenia	-0.210675	0.105096	-2.00461	0.0450053
BA	Cardiovascular	Stroke	-0.0111964	0.0362912	-0.308516	0.757689
BA	Hepatic	Bipolar_disorder	0.0164871	0.0763435	0.215959	0.82902
BA	Hepatic	Cirrhosis	0.474765	0.0945347	5.02212	5.11031e-07
BA	Hepatic	CKD	0.229687	0.0399289	5.7524	8.79854e-09
BA	Hepatic	COPD	0.175187	0.0330255	5.30461	1.12915e-07
BA	Hepatic	Dementia	-0.00698849	0.164862	-0.0423899	0.966188
BA	Hepatic	Depression	0.0648914	0.0174071	3.72787	0.000193105
BA	Hepatic	Diabetes	-0.0517046	0.030379	-1.70199	0.0887578
BA	Hepatic	Hypertensive_diseases	-0.030631	0.011529	-2.65686	0.00788718
BA	Hepatic	Ischemic_heart_disease	0.0874019	0.022	3.97281	7.10303e-05
BA	Hepatic	Multiple_Sclerosis	-0.00507679	0.0588652	-0.0862444	0.931272
BA	Hepatic	Osteoarthritis	0.0372413	0.0150925	2.46754	0.0136043
BA	Hepatic	Osteoporosis	-0.0970302	0.0378169	-2.56579	0.0102942
BA	Hepatic	Parkinsonism	0.23614	0.0867818	2.72108	0.00650689
BA	Hepatic	Schizophrenia	0.160795	0.0881398	1.82432	0.0681043
BA	Hepatic	Stroke	0.122689	0.0375309	3.26901	0.00107926
BA	Immune	Bipolar_disorder	0.17741	0.0739219	2.39996	0.0163968
BA	Immune	Cirrhosis	0.460049	0.102449	4.49051	7.10536e-06
BA	Immune	CKD	0.319085	0.0383376	8.32305	8.57298e-17
BA	Immune	COPD	0.271031	0.0317025	8.54918	1.23961e-17
BA	Immune	Dementia	0.26188	0.150688	1.7379	0.0822291
BA	Immune	Depression	0.0291884	0.0183021	1.59481	0.110754
BA	Immune	Diabetes	0.191252	0.0278697	6.86235	6.7739e-12
BA	Immune	Hypertensive_diseases	0.132118	0.0114505	11.5382	8.46822e-31
BA	Immune	Ischemic_heart_disease	0.217317	0.0201551	10.7822	4.17557e-27
BA	Immune	Multiple_Sclerosis	0.0436589	0.0622035	0.701871	0.482759
BA	Immune	Osteoarthritis	0.0126144	0.0153298	0.822869	0.410582
BA	Immune	Osteoporosis	0.0167599	0.0416792	0.402118	0.687597
BA	Immune	Parkinsonism	0.0914873	0.0832321	1.09918	0.271688
BA	Immune	Schizophrenia	0.327361	0.0822783	3.9787	6.9292e-05
BA	Immune	Stroke	0.153963	0.0355176	4.33484	1.45868e-05
BA	Metabolic	Bipolar_disorder	0.023508	0.0786308	0.298967	0.764965
BA	Metabolic	Cirrhosis	-0.081057	0.110087	-0.736297	0.46155
BA	Metabolic	CKD	0.21332	0.0374372	5.69809	1.2116e-08
BA	Metabolic	COPD	0.121665	0.0322015	3.77823	0.000157947
BA	Metabolic	Dementia	0.0271721	0.163546	0.166144	0.868044
BA	Metabolic	Depression	0.0819285	0.0168354	4.86645	1.13621e-06
BA	Metabolic	Diabetes	1.12684	0.0278469	40.4657	0
BA	Metabolic	Hypertensive_diseases	0.293357	0.0117149	25.0413	2.16954e-138
BA	Metabolic	Ischemic_heart_disease	0.349945	0.0209934	16.6693	2.19063e-62
BA	Metabolic	Multiple_Sclerosis	-0.144129	0.0597849	-2.41079	0.0159182
BA	Metabolic	Osteoarthritis	0.0332016	0.0147505	2.25088	0.0243933
BA	Metabolic	Osteoporosis	-0.0304153	0.034048	-0.893305	0.371694
BA	Metabolic	Parkinsonism	-0.320178	0.101554	-3.15277	0.00161727
BA	Metabolic	Schizophrenia	-0.061463	0.0982116	-0.625822	0.531432
BA	Metabolic	Stroke	0.178692	0.0361596	4.94177	7.74181e-07
BA	Musculoskeletal	Bipolar_disorder	0.263267	0.0775314	3.39562	0.00068474
BA	Musculoskeletal	Cirrhosis	0.522609	0.107841	4.84609	1.25916e-06
BA	Musculoskeletal	CKD	0.161404	0.0419479	3.84771	0.000119226
BA	Musculoskeletal	COPD	0.267902	0.0342791	7.81531	5.4827e-15
BA	Musculoskeletal	Dementia	0.425324	0.165644	2.56771	0.0102374
BA	Musculoskeletal	Depression	0.129951	0.0178987	7.26037	3.86028e-13
BA	Musculoskeletal	Diabetes	0.22897	0.0307834	7.43808	1.02156e-13
BA	Musculoskeletal	Hypertensive_diseases	0.179365	0.0118177	15.1777	4.96971e-52
BA	Musculoskeletal	Ischemic_heart_disease	0.244947	0.0223993	10.9355	7.79929e-28
BA	Musculoskeletal	Multiple_Sclerosis	0.109729	0.0598827	1.8324	0.0668922
BA	Musculoskeletal	Osteoarthritis	0.15391	0.0155202	9.91674	3.52064e-23
BA	Musculoskeletal	Osteoporosis	0.385347	0.0380947	10.1155	4.71619e-24
BA	Musculoskeletal	Parkinsonism	0.329731	0.0898925	3.66806	0.000244396
BA	Musculoskeletal	Schizophrenia	0.437526	0.089907	4.86643	1.13634e-06
BA	Musculoskeletal	Stroke	0.321535	0.0383704	8.37977	5.3031e-17
BA	Pulmonary	Bipolar_disorder	0.209043	0.08046	2.5981	0.00937422
BA	Pulmonary	Cirrhosis	0.399742	0.115479	3.4616	0.000536966
BA	Pulmonary	CKD	0.140706	0.0438092	3.2118	0.00131907
BA	Pulmonary	COPD	0.626102	0.0364187	17.1918	3.06044e-66
BA	Pulmonary	Dementia	0.332843	0.176811	1.88248	0.0597713
BA	Pulmonary	Depression	0.0423068	0.0181453	2.33155	0.0197242
BA	Pulmonary	Diabetes	0.364899	0.0330619	11.0368	2.53825e-28
BA	Pulmonary	Hypertensive_diseases	0.213724	0.012301	17.3746	1.28502e-67
BA	Pulmonary	Ischemic_heart_disease	0.318519	0.0241188	13.2063	8.07437e-40
BA	Pulmonary	Multiple_Sclerosis	-0.016894	0.0602834	-0.280244	0.779291
BA	Pulmonary	Osteoarthritis	0.0348985	0.016055	2.17368	0.029729
BA	Pulmonary	Osteoporosis	0.209925	0.0391536	5.36157	8.25009e-08
BA	Pulmonary	Parkinsonism	0.0787709	0.0964008	0.817118	0.413861
BA	Pulmonary	Schizophrenia	0.271945	0.0948781	2.86626	0.00415352
BA	Pulmonary	Stroke	0.256969	0.040883	6.28546	3.26878e-10
BA	Renal	Bipolar_disorder	0.370123	0.0692723	5.34302	9.14124e-08
BA	Renal	Cirrhosis	0.608645	0.0860732	7.07126	1.53537e-12
BA	Renal	CKD	0.70323	0.0343212	20.4897	2.6616e-93
BA	Renal	COPD	0.219106	0.0309008	7.09062	1.33517e-12
BA	Renal	Dementia	0.118592	0.15232	0.77857	0.436233
BA	Renal	Depression	0.0824825	0.0176998	4.66007	3.16102e-06
BA	Renal	Diabetes	0.32965	0.0271802	12.1283	7.47769e-34
BA	Renal	Hypertensive_diseases	0.196882	0.0115112	17.1035	1.39847e-65
BA	Renal	Ischemic_heart_disease	0.215045	0.0203921	10.5455	5.32937e-26
BA	Renal	Multiple_Sclerosis	-0.018121	0.0608851	-0.297627	0.765988
BA	Renal	Osteoarthritis	0.165372	0.0146236	11.3086	1.19014e-29
BA	Renal	Osteoporosis	0.0405976	0.0358755	1.13163	0.257792
BA	Renal	Parkinsonism	0.0815282	0.0844258	0.965679	0.334205
BA	Renal	Schizophrenia	0.334368	0.0814277	4.10632	4.02016e-05
BA	Renal	Stroke	0.309714	0.0337596	9.1741	4.55345e-20
BA	Brain	Bipolar_disorder	-0.0018279	0.0011202	-1.63177	0.103094
BA	Brain	Cirrhosis	0.0049696	0.00160352	3.09918	0.00200353
BA	Brain	CKD	0.00315045	0.00277858	1.13383	0.257179
BA	Brain	COPD	0.00590289	0.00336445	1.75449	0.0797019
BA	Brain	Dementia	NA	NA	NA	NA
BA	Brain	Depression	0.0100008	0.011903	0.840189	0.401035
BA	Brain	Diabetes	0.0173054	0.00527823	3.27863	0.00108485
BA	Brain	Hypertensive_diseases	0.0264444	0.0134903	1.96025	0.0502879
BA	Brain	Ischemic_heart_disease	-0.00646258	0.00644454	-1.0028	0.316238
BA	Brain	Multiple_Sclerosis	-0.00117274	0.00225726	-0.519542	0.603516
BA	Brain	Osteoarthritis	-0.00569028	0.0112954	-0.503768	0.614553
BA	Brain	Osteoporosis	0.00471949	0.0037217	1.2681	0.205104
BA	Brain	Parkinsonism	NA	NA	NA	NA
BA	Brain	Schizophrenia	0.000463454	0.00113844	0.407095	0.684039
BA	Brain	Stroke	0.00454564	0.00340159	1.33633	0.181795
BA	GM	Bipolar_disorder	-0.00150986	0.00112355	-1.34383	0.179357
BA	GM	Cirrhosis	0.0048823	0.00160788	3.03649	0.00246547
BA	GM	CKD	0.00551915	0.00278125	1.98442	0.0475259
BA	GM	COPD	0.00455124	0.0033753	1.34839	0.177886
BA	GM	Dementia	NA	NA	NA	NA
BA	GM	Depression	0.00258049	0.0119373	0.216171	0.828906
BA	GM	Diabetes	0.0181023	0.00528848	3.42297	0.000648564
BA	GM	Hypertensive_diseases	0.0283303	0.0135197	2.09548	0.0364188
BA	GM	Ischemic_heart_disease	-0.00705852	0.00645991	-1.09267	0.274846
BA	GM	Multiple_Sclerosis	0.00265883	0.00226144	1.17573	0.240029
BA	GM	Osteoarthritis	0.000964002	0.0113252	0.0851198	0.932186
BA	GM	Osteoporosis	0.00529558	0.00373011	1.41969	0.15606
BA	GM	Parkinsonism	NA	NA	NA	NA
BA	GM	Schizophrenia	0.000859807	0.00114102	0.753544	0.451328
BA	GM	Stroke	0.00874674	0.0034006	2.57212	0.010274
BA	WM	Bipolar_disorder	-0.000966624	0.00113018	-0.855282	0.392633
BA	WM	Cirrhosis	0.00479954	0.00161674	2.96865	0.0030738
BA	WM	CKD	0.00343433	0.00279986	1.22661	0.220304
BA	WM	COPD	0.00475341	0.00339283	1.40102	0.161569
BA	WM	Dementia	NA	NA	NA	NA
BA	WM	Depression	0.0206132	0.0119801	1.72063	0.0856773
BA	WM	Diabetes	0.0178946	0.00531757	3.36519	0.000798664
BA	WM	Hypertensive_diseases	0.0352421	0.0135726	2.59655	0.0095766
BA	WM	Ischemic_heart_disease	0.00458808	0.00649661	0.706227	0.480237
BA	WM	Multiple_Sclerosis	0.00386249	0.00227139	1.7005	0.0893975
BA	WM	Osteoarthritis	-0.00828625	0.0113816	-0.728042	0.466785
BA	WM	Osteoporosis	0.00727296	0.00374599	1.94153	0.0525191
BA	WM	Parkinsonism	NA	NA	NA	NA
BA	WM	Schizophrenia	-2.59515e-05	0.00114741	-0.0226174	0.981961
BA	WM	Stroke	0.000328458	0.0034316	0.0957156	0.923769
BA	FC	Bipolar_disorder	-0.000135915	0.00112364	-0.12096	0.903751
BA	FC	Cirrhosis	0.00205384	0.00161338	1.273	0.20336
BA	FC	CKD	0.00105404	0.00278469	0.378514	0.705142
BA	FC	COPD	0.00732506	0.0033664	2.17593	0.0298309
BA	FC	Dementia	NA	NA	NA	NA
BA	FC	Depression	0.0110563	0.0119202	0.927522	0.353915
BA	FC	Diabetes	0.00918127	0.00530997	1.72906	0.0841553
BA	FC	Hypertensive_diseases	0.0227021	0.013519	1.67928	0.0934602
BA	FC	Ischemic_heart_disease	-0.0019248	0.00645786	-0.298056	0.765732
BA	FC	Multiple_Sclerosis	-0.00187073	0.00226018	-0.82769	0.408075
BA	FC	Osteoarthritis	-0.00598894	0.0113126	-0.529404	0.596661
BA	FC	Osteoporosis	-0.00114616	0.00373068	-0.307224	0.758747
BA	FC	Parkinsonism	NA	NA	NA	NA
BA	FC	Schizophrenia	-0.00134999	0.00113937	-1.18486	0.2364
BA	FC	Stroke	-0.00130403	0.00341005	-0.382408	0.702253
Notes: Bdoy Sample Size:52072; Brain Sample Size:1072
FC: functional connectivity; GM: gray matter; WM: white matter

## Sheet: ST8.POA.with.Disease
Supplementary Table 8. Association between BAG (POA-based) and Disease Stauts
Clock Type	Organ	Outcome	Beta	Beta_SE	Z_score	P_Value
POA	Body	Bipolar_disorder	0.380376	0.0734874	5.17607	2.26612e-07
POA	Body	Cirrhosis	0.825652	0.102973	8.01812	1.07372e-15
POA	Body	CKD	0.869618	0.040414	21.5177	1.062e-102
POA	Body	COPD	0.437518	0.0331681	13.1909	9.8936e-40
POA	Body	Dementia	0.335219	0.160156	2.09307	0.0363425
POA	Body	Depression	0.132746	0.0178766	7.42571	1.12179e-13
POA	Body	Diabetes	0.711744	0.0292857	24.3034	1.80254e-130
POA	Body	Hypertensive_diseases	0.320116	0.0120698	26.5221	5.39484e-155
POA	Body	Ischemic_heart_disease	0.418703	0.0216196	19.3668	1.46997e-83
POA	Body	Multiple_Sclerosis	0.158856	0.0594813	2.67068	0.00756982
POA	Body	Osteoarthritis	0.173656	0.015672	11.0806	1.55777e-28
POA	Body	Osteoporosis	0.209697	0.040539	5.17272	2.30705e-07
POA	Body	Parkinsonism	0.117041	0.0886633	1.32006	0.186815
POA	Body	Schizophrenia	0.227134	0.0869678	2.6117	0.00900929
POA	Body	Stroke	0.417996	0.0366481	11.4057	3.91777e-30
POA	Cardiovascular	Bipolar_disorder	0.00568884	0.0854325	0.0665888	0.946909
POA	Cardiovascular	Cirrhosis	0.438853	0.113072	3.88117	0.000103957
POA	Cardiovascular	CKD	0.224806	0.0431612	5.20853	1.90347e-07
POA	Cardiovascular	COPD	0.219892	0.0363078	6.05634	1.39255e-09
POA	Cardiovascular	Dementia	0.251504	0.171582	1.46579	0.142704
POA	Cardiovascular	Depression	-0.0286529	0.0185529	-1.54439	0.122494
POA	Cardiovascular	Diabetes	0.642208	0.0334889	19.1767	5.79131e-82
POA	Cardiovascular	Hypertensive_diseases	0.31831	0.0128633	24.7457	3.4504e-135
POA	Cardiovascular	Ischemic_heart_disease	0.261472	0.0246002	10.6288	2.18832e-26
POA	Cardiovascular	Multiple_Sclerosis	0.106528	0.060739	1.75386	0.0794544
POA	Cardiovascular	Osteoarthritis	0.0892	0.0159527	5.59154	2.25067e-08
POA	Cardiovascular	Osteoporosis	0.0397788	0.0365475	1.08841	0.276413
POA	Cardiovascular	Parkinsonism	0.269819	0.09624	2.80361	0.00505344
POA	Cardiovascular	Schizophrenia	0.0685938	0.103858	0.660457	0.508961
POA	Cardiovascular	Stroke	0.229143	0.0411513	5.56831	2.57221e-08
POA	Hepatic	Bipolar_disorder	-0.0343929	0.0810897	-0.424134	0.671468
POA	Hepatic	Cirrhosis	0.703813	0.104136	6.7586	1.39327e-11
POA	Hepatic	CKD	0.336475	0.0431926	7.7901	6.69538e-15
POA	Hepatic	COPD	0.304571	0.0357063	8.5299	1.46474e-17
POA	Hepatic	Dementia	-0.0498636	0.176721	-0.28216	0.777821
POA	Hepatic	Depression	0.0549325	0.0185177	2.96648	0.00301227
POA	Hepatic	Diabetes	0.0124722	0.0325301	0.383404	0.70142
POA	Hepatic	Hypertensive_diseases	-0.00972307	0.0121937	-0.797385	0.425228
POA	Hepatic	Ischemic_heart_disease	0.103346	0.0234485	4.40735	1.04641e-05
POA	Hepatic	Multiple_Sclerosis	-0.028307	0.062144	-0.455506	0.648745
POA	Hepatic	Osteoarthritis	0.0750356	0.0161049	4.65919	3.17459e-06
POA	Hepatic	Osteoporosis	-0.147618	0.0409655	-3.60348	0.000313984
POA	Hepatic	Parkinsonism	0.162361	0.0941827	1.7239	0.0847262
POA	Hepatic	Schizophrenia	0.045243	0.096556	0.468568	0.639379
POA	Hepatic	Stroke	0.183381	0.0402419	4.55696	5.1899e-06
POA	Immune	Bipolar_disorder	0.189316	0.0761354	2.48657	0.012898
POA	Immune	Cirrhosis	0.612766	0.105195	5.82505	5.70954e-09
POA	Immune	CKD	0.458227	0.0394086	11.6276	2.98443e-31
POA	Immune	COPD	0.379173	0.0325126	11.6623	1.98534e-31
POA	Immune	Dementia	0.0765356	0.162076	0.472219	0.63677
POA	Immune	Depression	0.0555908	0.0190306	2.92113	0.00348767
POA	Immune	Diabetes	0.333845	0.0282759	11.8067	3.60507e-32
POA	Immune	Hypertensive_diseases	0.19924	0.0118728	16.7812	3.35173e-63
POA	Immune	Ischemic_heart_disease	0.280109	0.0206505	13.5643	6.52327e-42
POA	Immune	Multiple_Sclerosis	0.0480299	0.0652864	0.73568	0.461925
POA	Immune	Osteoarthritis	0.0542724	0.0158423	3.42579	0.000613018
POA	Immune	Osteoporosis	-0.00622213	0.0450011	-0.138266	0.89003
POA	Immune	Parkinsonism	0.120075	0.0852307	1.40883	0.158886
POA	Immune	Schizophrenia	0.328844	0.0843508	3.89852	9.67805e-05
POA	Immune	Stroke	0.243594	0.0360617	6.75494	1.42891e-11
POA	Metabolic	Bipolar_disorder	0.198825	0.0813585	2.44381	0.014533
POA	Metabolic	Cirrhosis	0.227234	0.110729	2.05217	0.0401531
POA	Metabolic	CKD	0.232588	0.0429391	5.41669	6.07128e-08
POA	Metabolic	COPD	0.198425	0.0356239	5.57001	2.54731e-08
POA	Metabolic	Dementia	-0.0174777	0.178281	-0.0980347	0.921905
POA	Metabolic	Depression	0.10804	0.0177808	6.0762	1.23064e-09
POA	Metabolic	Diabetes	1.28782	0.034394	37.4432	7.76334e-307
POA	Metabolic	Hypertensive_diseases	0.367691	0.0128134	28.6959	4.29248e-181
POA	Metabolic	Ischemic_heart_disease	0.462121	0.0242996	19.0177	1.21801e-80
POA	Metabolic	Multiple_Sclerosis	-0.0975405	0.0589088	-1.65579	0.0977644
POA	Metabolic	Osteoarthritis	0.0861903	0.0157764	5.46323	4.6755e-08
POA	Metabolic	Osteoporosis	0.047689	0.0361617	1.31877	0.187246
POA	Metabolic	Parkinsonism	-0.155233	0.101506	-1.5293	0.126191
POA	Metabolic	Schizophrenia	0.0617562	0.10163	0.607659	0.543414
POA	Metabolic	Stroke	0.223573	0.0406304	5.5026	3.74231e-08
POA	Musculoskeletal	Bipolar_disorder	0.312079	0.0837954	3.7243	0.000195855
POA	Musculoskeletal	Cirrhosis	0.947566	0.121628	7.79068	6.66504e-15
POA	Musculoskeletal	CKD	0.518569	0.0468739	11.0631	1.89516e-28
POA	Musculoskeletal	COPD	0.490075	0.0388202	12.6242	1.5524e-36
POA	Musculoskeletal	Dementia	0.36456	0.189259	1.92624	0.0540739
POA	Musculoskeletal	Depression	0.143193	0.0179959	7.95698	1.76285e-15
POA	Musculoskeletal	Diabetes	0.72817	0.0362966	20.0617	1.59648e-89
POA	Musculoskeletal	Hypertensive_diseases	0.406488	0.0132499	30.6786	1.0994e-206
POA	Musculoskeletal	Ischemic_heart_disease	0.550469	0.0265881	20.7036	3.21687e-95
POA	Musculoskeletal	Multiple_Sclerosis	0.164277	0.0592697	2.77169	0.00557666
POA	Musculoskeletal	Osteoarthritis	0.228736	0.0166177	13.7646	4.1595e-43
POA	Musculoskeletal	Osteoporosis	0.0185869	0.0384661	0.483202	0.628953
POA	Musculoskeletal	Parkinsonism	0.0429777	0.10329	0.416086	0.677347
POA	Musculoskeletal	Schizophrenia	0.33485	0.102066	3.28072	0.00103542
POA	Musculoskeletal	Stroke	0.498929	0.0437054	11.4157	3.48909e-30
POA	Pulmonary	Bipolar_disorder	0.499772	0.087843	5.68938	1.27502e-08
POA	Pulmonary	Cirrhosis	0.933953	0.125926	7.41668	1.2009e-13
POA	Pulmonary	CKD	0.737053	0.0487912	15.1063	1.47231e-51
POA	Pulmonary	COPD	0.73814	0.0401483	18.3853	1.72188e-75
POA	Pulmonary	Dementia	0.586996	0.196781	2.98298	0.00285452
POA	Pulmonary	Depression	0.169243	0.0197831	8.55494	1.1793e-17
POA	Pulmonary	Diabetes	1.0081	0.0374818	26.8958	2.45795e-159
POA	Pulmonary	Hypertensive_diseases	0.566462	0.0142527	39.7443	0
POA	Pulmonary	Ischemic_heart_disease	0.794409	0.0273448	29.0515	1.47305e-185
POA	Pulmonary	Multiple_Sclerosis	0.078959	0.0660221	1.19595	0.231717
POA	Pulmonary	Osteoarthritis	0.199774	0.0176668	11.3079	1.19908e-29
POA	Pulmonary	Osteoporosis	0.234655	0.0427329	5.49121	3.99187e-08
POA	Pulmonary	Parkinsonism	0.013674	0.106174	0.128789	0.897525
POA	Pulmonary	Schizophrenia	0.339324	0.103073	3.29206	0.000994556
POA	Pulmonary	Stroke	0.549882	0.0444965	12.3579	4.41695e-35
POA	Renal	Bipolar_disorder	0.444487	0.0699984	6.34996	2.15369e-10
POA	Renal	Cirrhosis	0.588739	0.0944334	6.23443	4.53421e-10
POA	Renal	CKD	0.992135	0.0361711	27.4289	1.23921e-165
POA	Renal	COPD	0.271648	0.0312403	8.69543	3.45507e-18
POA	Renal	Dementia	0.258594	0.148714	1.73887	0.0820573
POA	Renal	Depression	0.129273	0.0178699	7.23414	4.68489e-13
POA	Renal	Diabetes	0.43129	0.0276461	15.6004	7.22991e-55
POA	Renal	Hypertensive_diseases	0.288826	0.0118382	24.3979	1.80112e-131
POA	Renal	Ischemic_heart_disease	0.338238	0.0205706	16.4428	9.44863e-61
POA	Renal	Multiple_Sclerosis	0.0276836	0.0605755	0.45701	0.647664
POA	Renal	Osteoarthritis	0.201031	0.0148483	13.539	9.20127e-42
POA	Renal	Osteoporosis	0.057933	0.036193	1.60067	0.10945
POA	Renal	Parkinsonism	0.230275	0.0822341	2.80024	0.0051065
POA	Renal	Schizophrenia	0.327835	0.0858903	3.81691	0.000135135
POA	Renal	Stroke	0.404625	0.0340024	11.8999	1.18476e-32
POA	Brain	Bipolar_disorder	-0.000497916	0.00116678	-0.426744	0.669672
POA	Brain	Cirrhosis	0.00219352	0.00167539	1.30926	0.190796
POA	Brain	CKD	-0.00237622	0.00289098	-0.821941	0.411338
POA	Brain	COPD	-0.00394645	0.00350298	-1.1266	0.260225
POA	Brain	Dementia	NA	NA	NA	NA
POA	Brain	Depression	0.0295344	0.0123444	2.39254	0.016945
POA	Brain	Diabetes	0.0127159	0.00550692	2.30907	0.021175
POA	Brain	Hypertensive_diseases	0.0371357	0.0140053	2.65154	0.00815948
POA	Brain	Ischemic_heart_disease	0.0168735	0.00668214	2.52517	0.0117422
POA	Brain	Multiple_Sclerosis	0.00228886	0.00234682	0.975304	0.329683
POA	Brain	Osteoarthritis	0.0287999	0.011709	2.45964	0.0141027
POA	Brain	Osteoporosis	0.000315676	0.00387448	0.0814756	0.935083
POA	Brain	Parkinsonism	NA	NA	NA	NA
POA	Brain	Schizophrenia	0.000559499	0.00118404	0.472535	0.636665
POA	Brain	Stroke	0.000603965	0.00354155	0.170537	0.864628
POA	GM	Bipolar_disorder	-0.000421334	0.00116306	-0.362262	0.717245
POA	GM	Cirrhosis	0.00265829	0.00166922	1.59253	0.111631
POA	GM	CKD	-0.00183258	0.00288215	-0.635839	0.52505
POA	GM	COPD	-0.000925168	0.00349415	-0.264776	0.791245
POA	GM	Dementia	0	0
POA	GM	Depression	0.0251432	0.0123158	2.04154	0.0415005
POA	GM	Diabetes	0.0160485	0.00547899	2.9291	0.0034889
POA	GM	Hypertensive_diseases	0.0318284	0.0139752	2.2775	0.0230004
POA	GM	Ischemic_heart_disease	0.0151858	0.00666522	2.27836	0.0229485
POA	GM	Multiple_Sclerosis	0.00290676	0.00233848	1.24301	0.214201
POA	GM	Osteoarthritis	0.021695	0.0116889	1.85603	0.0637895
POA	GM	Osteoporosis	0.00200913	0.00386144	0.520305	0.602984
POA	GM	Parkinsonism	NA	NA	NA	NA
POA	GM	Schizophrenia	0.000546085	0.00118024	0.46269	0.643703
POA	GM	Stroke	0.00115726	0.00353001	0.327836	0.743115
POA	WM	Bipolar_disorder	-0.000790763	0.0011892	-0.664956	0.506256
POA	WM	Cirrhosis	0.00227127	0.00170779	1.32995	0.183886
POA	WM	CKD	-0.000331997	0.00294811	-0.112614	0.910363
POA	WM	COPD	-0.00196707	0.00357282	-0.550566	0.582074
POA	WM	Dementia	NA	NA	NA	NA
POA	WM	Depression	0.0256101	0.012595	2.03336	0.0423217
POA	WM	Diabetes	0.0155056	0.00560609	2.76585	0.00579866
POA	WM	Hypertensive_diseases	0.0490651	0.014237	3.44632	0.000595729
POA	WM	Ischemic_heart_disease	0.0109652	0.00682647	1.60628	0.108578
POA	WM	Multiple_Sclerosis	0.00235991	0.00239224	0.986486	0.324171
POA	WM	Osteoarthritis	0.0282328	0.0119389	2.36477	0.0182616
POA	WM	Osteoporosis	0.0006086	0.00394948	0.154096	0.87757
POA	WM	Parkinsonism	NA	NA	NA	NA
POA	WM	Schizophrenia	-0.000351434	0.00120707	-0.291147	0.771009
POA	WM	Stroke	-0.00205624	0.00360952	-0.569672	0.569048
POA	FC	Bipolar_disorder	0.00031878	0.00139215	0.228984	0.818935
POA	FC	Cirrhosis	0.00172257	0.00199998	0.861292	0.389317
POA	FC	CKD	-0.000123878	0.00345049	-0.0359018	0.971369
POA	FC	COPD	-0.00578148	0.00417773	-1.38388	0.166753
POA	FC	Dementia	NA	NA	NA	NA
POA	FC	Depression	0.0411334	0.0147099	2.7963	0.005284
POA	FC	Diabetes	0.0110602	0.00657963	1.68098	0.0931286
POA	FC	Hypertensive_diseases	0.0572157	0.0166638	3.43353	0.000624147
POA	FC	Ischemic_heart_disease	0.0237573	0.00796067	2.98434	0.00292209
POA	FC	Multiple_Sclerosis	0.00149981	0.00280099	0.535455	0.592473
POA	FC	Osteoarthritis	0.0277878	0.0139865	1.98675	0.047266
POA	FC	Osteoporosis	0.00103027	0.0046224	0.222886	0.823677
POA	FC	Parkinsonism	NA	NA	NA	NA
POA	FC	Schizophrenia	0.00154534	0.00141184	1.09456	0.274016
POA	FC	Stroke	-0.000787612	0.00422529	-0.186404	0.852172
Notes: Bdoy Sample Size:52072; Brain Sample Size:1072
FC: functional connectivity; GM: gray matter; WM: white matter

## Sheet: ST9.BA.DiseaseRisk
Supplementary Table 9. Chronic disease risk estimates of organ age gaps (BA-based)
Clock Type	Organ	Outcome	Beta	Beta_SE	HR	HR_SE	CIL_HR	CIU_HR	P_Value	FDR	Z_score
BA	Body	Bipolar_disorder	0.269765	0.106015	1.31835	0.138843	1.06394	1.61213	0.093438	0.129755	2.57524
BA	Body	Cirrhosis	0.506651	0.0502489	1.66244	0.0833994	1.50405	1.83151	7.99573e-15	2.47263e-14	10.1106
BA	Body	CKD	0.516992	0.0175506	1.67733	0.0294319	1.62027	1.73567	4.51621e-155	9.23314e-154	29.4651
BA	Body	COPD	0.495341	0.0196298	1.64141	0.0322136	1.57912	1.70543	1.55424e-114	2.04272e-113	25.2429
BA	Body	Dementia	0.161512	0.0279633	1.17561	0.0328649	1.1126	1.2415	3.4538e-06	7.38952e-06	5.77715
BA	Body	Depression	0.12366	0.0211837	1.13191	0.0239721	1.08561	1.1796	6.67996e-05	0.000133599	5.84145
BA	Body	Diabetes	0.365162	0.0163956	1.44097	0.023622	1.39518	1.4878	1.31055e-82	1.20571e-81	22.2773
BA	Body	Hypertensive_diseases	0.296884	0.0118327	1.34574	0.0159227	1.31481	1.37723	6.56277e-111	7.79064e-110	25.0924
BA	Body	Ischemic_heart_disease	0.260194	0.015247	1.29734	0.0197781	1.25899	1.33653	2.12936e-47	1.30601e-46	17.0678
BA	Body	Multiple_Sclerosis	0.129958	0.0931139	1.14452	0.106036	0.948811	1.36678	0.28267	0.344446	1.41266
BA	Body	Osteoarthritis	0.0486027	0.012142	1.0499	0.0127467	1.02511	1.07509	0.00383713	0.00659843	4.00418
BA	Body	Osteoporosis	0.041268	0.103651	1.04618	0.108018	0.850537	1.27689	0.531461	0.534043	0.412964
BA	Body	Parkinsonism	-0.0222961	0.0353245	0.978533	0.0345456	0.912532	1.04806	0.42473	0.470785	-0.626688
BA	Body	Schizophrenia	0.196638	0.086236	1.2212	0.104975	1.028	1.44147	0.101732	0.139172	2.29386
BA	Body	Stroke	0.251498	0.0265355	1.2864	0.0341234	1.22078	1.3546	6.10509e-14	1.79734e-13	9.48494
BA	Body	AllCauseMortality	0.347187	0.0134236	1.41524	0.0189954	1.37834	1.45281	1.59658e-118	2.35017e-117	25.8681
BA	Cardiovascular	Bipolar_disorder	-0.034512	0.111226	0.973436	0.107453	0.776845	1.2014	0.446526	0.487833	-0.251231
BA	Cardiovascular	Cirrhosis	0.107924	0.0537412	1.1155	0.0598658	1.00259	1.2377	0.147457	0.191747	2.02891
BA	Cardiovascular	CKD	0.0790045	0.0169697	1.08239	0.0183647	1.04681	1.11881	0.00189275	0.00341438	4.66355
BA	Cardiovascular	COPD	0.0250923	0.0203624	1.02562	0.0208798	0.985291	1.06716	0.309538	0.373475	1.23916
BA	Cardiovascular	Dementia	0.0823819	0.0254398	1.08619	0.0276243	1.03305	1.14139	0.020101	0.0317475	3.24566
BA	Cardiovascular	Depression	-0.059566	0.0216136	0.942471	0.0203638	0.903094	0.982944	0.0648842	0.0929081	-2.74547
BA	Cardiovascular	Diabetes	0.126201	0.016368	1.1347	0.0185697	1.09869	1.1715	2.37411e-07	5.35995e-07	7.71776
BA	Cardiovascular	Hypertensive_diseases	0.294332	0.0106452	1.34232	0.0142883	1.31451	1.37053	1.92822e-134	3.08515e-133	27.6551
BA	Cardiovascular	Ischemic_heart_disease	0.0984225	0.0150893	1.10356	0.01665	1.07127	1.13655	1.27521e-05	2.6364e-05	6.53019
BA	Cardiovascular	Multiple_Sclerosis	0.0325388	0.0973747	1.03935	0.100595	0.85358	1.25031	0.407069	0.456711	0.3823
BA	Cardiovascular	Osteoarthritis	-0.0371775	0.0115783	0.96356	0.0111557	0.941886	0.98562	0.0195372	0.03099	-3.20857
BA	Cardiovascular	Osteoporosis	0.0602526	0.0948561	1.06589	0.100747	0.88191	1.27912	0.449823	0.48966	0.668102
BA	Cardiovascular	Parkinsonism	-0.0172646	0.033901	0.983465	0.0333208	0.919697	1.05041	0.493514	0.519779	-0.498832
BA	Cardiovascular	Schizophrenia	0.0269401	0.0877774	1.03111	0.0901743	0.864933	1.22016	0.484804	0.515629	0.339042
BA	Cardiovascular	Stroke	0.115533	0.0255063	1.12297	0.0286301	1.06774	1.18001	0.001854	0.00336095	4.54507
BA	Cardiovascular	AllCauseMortality	0.0867422	0.013103	1.09072	0.0142903	1.06296	1.11899	4.4566e-06	9.47993e-06	6.62622
BA	Hepatic	Bipolar_disorder	0.271326	0.102703	1.31803	0.134716	1.07254	1.6042	0.0628603	0.0903617	2.69294
BA	Hepatic	Cirrhosis	0.451832	0.0528933	1.57393	0.0831053	1.41646	1.74282	5.50682e-09	1.31592e-08	8.56851
BA	Hepatic	CKD	0.179936	0.0187173	1.19735	0.0224073	1.15402	1.24187	2.38998e-13	6.76547e-13	9.61791
BA	Hepatic	COPD	0.207347	0.0214321	1.23071	0.0263703	1.17979	1.2832	4.16392e-15	1.33246e-14	9.68215
BA	Hepatic	Dementia	0.0810492	0.0297508	1.08481	0.0322624	1.023	1.14954	0.0424222	0.0626963	2.72814
BA	Hepatic	Depression	0.0686506	0.0211226	1.0713	0.0226236	1.02763	1.11633	0.0214839	0.0336428	3.25397
BA	Hepatic	Diabetes	-0.0311065	0.017815	0.969558	0.0172693	0.936109	1.00382	0.196147	0.248049	-1.74704
BA	Hepatic	Hypertensive_diseases	0.066067	0.0123035	1.06837	0.0131438	1.04284	1.09437	8.6914e-05	0.000171959	5.37093
BA	Hepatic	Ischemic_heart_disease	0.080736	0.0163807	1.08423	0.017758	1.04983	1.11946	0.000689895	0.00127579	4.93142
BA	Hepatic	Multiple_Sclerosis	-0.0842973	0.093585	0.923696	0.0860194	0.765119	1.10421	0.360528	0.416432	-0.887658
BA	Hepatic	Osteoarthritis	0.0371507	0.0121807	1.03792	0.0126417	1.01337	1.06293	0.0195032	0.03099	3.0498
BA	Hepatic	Osteoporosis	-0.00519185	0.0998623	0.999403	0.0993451	0.817976	1.2099	0.509382	0.523611	-0.0238893
BA	Hepatic	Parkinsonism	0.0214247	0.0371867	1.02269	0.0379921	0.94984	1.0989	0.387235	0.437124	0.581451
BA	Hepatic	Schizophrenia	-0.0247791	0.0902745	0.978108	0.0880651	0.817326	1.16435	0.557736	0.557736	-0.268441
BA	Hepatic	Stroke	0.117872	0.0281735	1.12559	0.031698	1.06466	1.18898	0.00228953	0.00403156	4.19067
BA	Hepatic	AllCauseMortality	0.219117	0.0142794	1.24507	0.0177775	1.21062	1.28031	2.15764e-42	1.24065e-41	15.3477
BA	Immune	Bipolar_disorder	0.183662	0.10923	1.21176	0.131252	0.970029	1.48848	0.2191	0.274248	1.71877
BA	Immune	Cirrhosis	0.491509	0.0470208	1.63717	0.0768687	1.49085	1.7926	4.85784e-15	1.54111e-14	10.4836
BA	Immune	CKD	0.155124	0.0182876	1.16806	0.0213563	1.12669	1.21042	4.91241e-11	1.2821e-10	8.48489
BA	Immune	COPD	0.303953	0.0199472	1.35556	0.0270325	1.30324	1.40924	3.33854e-36	1.70636e-35	15.246
BA	Immune	Dementia	-0.0167049	0.0284547	0.984011	0.0279833	0.930088	1.03984	0.446738	0.487833	-0.58164
BA	Immune	Depression	0.0741461	0.0217211	1.07725	0.0233929	1.03208	1.1238	0.0135338	0.0221352	3.415
BA	Immune	Diabetes	0.0952781	0.0165713	1.10013	0.0182278	1.06481	1.13628	1.30681e-05	2.68663e-05	5.75339
BA	Immune	Hypertensive_diseases	0.0658797	0.011817	1.06818	0.0126218	1.04364	1.09313	4.09922e-05	8.33433e-05	5.57864
BA	Immune	Ischemic_heart_disease	0.0808742	0.0152564	1.08436	0.0165415	1.05229	1.11715	7.51756e-05	0.000149538	5.30464
BA	Immune	Multiple_Sclerosis	-0.0255408	0.098126	0.97932	0.0956516	0.804232	1.1815	0.494355	0.519779	-0.253834
BA	Immune	Osteoarthritis	0.0269875	0.0123361	1.02745	0.0126736	1.00281	1.0525	0.12372	0.16496	2.18861
BA	Immune	Osteoporosis	0.0271949	0.111894	1.03281	0.114979	0.82521	1.27955	0.526334	0.532118	0.255816
BA	Immune	Parkinsonism	-0.00720493	0.0343435	0.993393	0.0340969	0.928191	1.06195	0.519975	0.528594	-0.205247
BA	Immune	Schizophrenia	0.0788039	0.0872811	1.08619	0.0944375	0.911862	1.28386	0.375172	0.426121	0.92168
BA	Immune	Stroke	0.118667	0.0265413	1.12644	0.0298853	1.06892	1.18612	0.0020905	0.00371645	4.47785
BA	Immune	AllCauseMortality	0.287193	0.013255	1.33283	0.0176647	1.2985	1.36776	5.52045e-83	5.20904e-82	21.669
BA	Metabolic	Bipolar_disorder	0.175902	0.0981928	1.19888	0.117077	0.983581	1.44536	0.195219	0.248049	1.87619
BA	Metabolic	Cirrhosis	0.294477	0.051308	1.34443	0.0688771	1.21399	1.48444	3.64305e-05	7.44801e-05	5.78324
BA	Metabolic	CKD	0.243244	0.0169325	1.27559	0.0215954	1.23375	1.31842	8.91973e-32	4.10308e-31	14.3828
BA	Metabolic	COPD	0.156821	0.0206124	1.17003	0.0241121	1.12347	1.21801	3.88903e-08	9.17412e-08	7.62052
BA	Metabolic	Dementia	0.058882	0.028861	1.06106	0.0306114	1.00232	1.12238	0.138255	0.181061	2.05307
BA	Metabolic	Depression	0.0802327	0.020118	1.08375	0.0217986	1.04165	1.12712	0.0080153	0.0133468	3.99783
BA	Metabolic	Diabetes	0.806761	0.0121156	2.24099	0.0271467	2.18806	2.29448	0	0	66.6201
BA	Metabolic	Hypertensive_diseases	0.168597	0.0118741	1.18374	0.0140546	1.15641	1.21151	5.3268e-32	2.48134e-31	14.2036
BA	Metabolic	Ischemic_heart_disease	0.128629	0.0161873	1.13746	0.0184093	1.10175	1.17393	2.59388e-09	6.36366e-09	7.95644
BA	Metabolic	Multiple_Sclerosis	-0.0223651	0.0913379	0.982899	0.0893178	0.817596	1.16959	0.451073	0.48966	-0.183626
BA	Metabolic	Osteoarthritis	0.0388174	0.0117227	1.03967	0.0121867	1.01597	1.06374	0.0271206	0.0415849	3.31934
BA	Metabolic	Osteoporosis	-0.236559	0.099849	0.793257	0.0788148	0.649039	0.959968	0.0930479	0.129703	-2.35606
BA	Metabolic	Parkinsonism	-0.080127	0.0391051	0.923638	0.0360939	0.854898	0.996525	0.133772	0.176445	-2.03794
BA	Metabolic	Schizophrenia	0.183561	0.0824832	1.20469	0.0991026	1.02214	1.41231	0.0997065	0.137423	2.28254
BA	Metabolic	Stroke	0.101615	0.0276803	1.1075	0.0306409	1.0485	1.16867	0.0231156	0.0358926	3.69206
BA	Metabolic	AllCauseMortality	0.141593	0.0140197	1.15222	0.0161522	1.12088	1.1842	2.69276e-14	7.99143e-14	10.1057
BA	Musculoskeletal	Bipolar_disorder	0.236753	0.108534	1.27588	0.137526	1.02432	1.5675	0.117174	0.157949	2.18855
BA	Musculoskeletal	Cirrhosis	0.379724	0.0558355	1.46417	0.0816249	1.31034	1.63095	5.10276e-07	1.13121e-06	6.8077
BA	Musculoskeletal	CKD	0.187245	0.0191493	1.20619	0.0230926	1.1615	1.25204	5.26378e-16	1.69919e-15	9.78168
BA	Musculoskeletal	COPD	0.307375	0.021759	1.36028	0.029589	1.30308	1.4191	2.84563e-35	1.43451e-34	14.1286
BA	Musculoskeletal	Dementia	0.146985	0.0298956	1.1588	0.0346292	1.09241	1.22824	0.000208198	0.000403246	4.91862
BA	Musculoskeletal	Depression	0.158789	0.0211554	1.17234	0.0247961	1.12448	1.22171	1.48267e-09	3.66188e-09	7.50805
BA	Musculoskeletal	Diabetes	0.277578	0.017411	1.32015	0.0229813	1.27565	1.36575	1.61297e-40	9.13186e-40	15.946
BA	Musculoskeletal	Hypertensive_diseases	0.146043	0.0122372	1.15732	0.0141614	1.12982	1.18534	1.25414e-23	4.96263e-23	11.9351
BA	Musculoskeletal	Ischemic_heart_disease	0.172812	0.0162526	1.18881	0.0193185	1.15137	1.22712	1.8356e-17	6.14091e-17	10.6334
BA	Musculoskeletal	Multiple_Sclerosis	0.0434862	0.0920401	1.04872	0.0961309	0.872047	1.25093	0.454673	0.490673	0.479899
BA	Musculoskeletal	Osteoarthritis	0.0690222	0.0122814	1.07152	0.013159	1.04598	1.09756	9.01168e-06	1.89503e-05	5.62137
BA	Musculoskeletal	Osteoporosis	0.0503865	0.100321	1.05503	0.105505	0.863948	1.2802	0.511217	0.524033	0.513735
BA	Musculoskeletal	Parkinsonism	0.182622	0.0368348	1.20105	0.0442151	1.11675	1.29023	0.000686822	0.00127579	4.96075
BA	Musculoskeletal	Schizophrenia	0.259403	0.0885964	1.30212	0.114835	1.08954	1.54196	0.0487084	0.0708758	2.93478
BA	Musculoskeletal	Stroke	0.0678734	0.0284395	1.0706	0.0304368	1.01221	1.13158	0.0784191	0.111221	2.38704
BA	Musculoskeletal	AllCauseMortality	0.21593	0.0145052	1.24119	0.0180012	1.20623	1.2768	5.56911e-35	2.73258e-34	14.8875
BA	Pulmonary	Bipolar_disorder	0.258506	0.107998	1.29998	0.139857	1.04794	1.60029	0.0674021	0.0961394	2.41075
BA	Pulmonary	Cirrhosis	0.381706	0.0574504	1.4677	0.0841523	1.30879	1.63937	2.89883e-06	6.23842e-06	6.65097
BA	Pulmonary	CKD	0.266268	0.0197514	1.30537	0.0257773	1.25553	1.3566	3.45238e-29	1.53069e-28	13.4834
BA	Pulmonary	COPD	0.809528	0.0221675	2.24737	0.0498069	2.15132	2.34662	2.92399e-240	8.96691e-239	36.522
BA	Pulmonary	Dementia	0.132725	0.0316235	1.14246	0.0361121	1.0733	1.21495	0.00152883	0.00279906	4.19492
BA	Pulmonary	Depression	0.129744	0.0211196	1.13879	0.0240454	1.09237	1.18666	1.66287e-06	3.64247e-06	6.14536
BA	Pulmonary	Diabetes	0.443507	0.0175992	1.55838	0.0274225	1.50533	1.61285	2.39763e-113	3.04252e-112	25.2035
BA	Pulmonary	Hypertensive_diseases	0.225592	0.0123878	1.25314	0.0155226	1.22301	1.28386	3.17023e-55	2.20121e-54	18.2106
BA	Pulmonary	Ischemic_heart_disease	0.221238	0.0167508	1.24784	0.0208986	1.20732	1.28926	1.8597e-24	7.52053e-24	13.2095
BA	Pulmonary	Multiple_Sclerosis	0.104377	0.0892908	1.11455	0.0991145	0.931803	1.32232	0.301336	0.364775	1.17272
BA	Pulmonary	Osteoarthritis	0.0592228	0.0124176	1.06108	0.0131752	1.0355	1.08715	0.000518604	0.000973706	4.76963
BA	Pulmonary	Osteoporosis	-0.128795	0.100015	0.882653	0.0879286	0.722654	1.06955	0.325449	0.387946	-1.28966
BA	Pulmonary	Parkinsonism	0.0284687	0.0387689	1.02972	0.0398884	0.953593	1.11011	0.456595	0.491307	0.73406
BA	Pulmonary	Schizophrenia	0.363356	0.0888704	1.44433	0.127809	1.20825	1.71179	0.0046183	0.00786822	4.10203
BA	Pulmonary	Stroke	0.231615	0.0291975	1.26111	0.0368074	1.19052	1.33488	1.80205e-11	4.7709e-11	7.93549
BA	Pulmonary	AllCauseMortality	0.324581	0.0150605	1.38361	0.0208355	1.34321	1.4249	4.24624e-86	4.22329e-85	21.5536
BA	Renal	Bipolar_disorder	0.319442	0.0992718	1.38467	0.136634	1.133	1.67199	0.0346013	0.0521856	3.27215
BA	Renal	Cirrhosis	0.417494	0.0484587	1.51986	0.0735677	1.38059	1.66941	1.65165e-11	4.40439e-11	8.64443
BA	Renal	CKD	0.593702	0.0154395	1.81088	0.027956	1.75671	1.86631	6.56798e-276	3.02127e-274	38.4694
BA	Renal	COPD	0.295525	0.0193317	1.34413	0.0259786	1.29387	1.39573	9.58952e-38	5.04135e-37	15.2969
BA	Renal	Dementia	0.0846701	0.0271318	1.08873	0.0295291	1.03199	1.1478	0.0305637	0.046477	3.12841
BA	Renal	Depression	0.167292	0.020423	1.18235	0.0241421	1.13572	1.23038	5.47603e-11	1.39943e-10	8.19759
BA	Renal	Diabetes	0.197578	0.0164829	1.21865	0.0200836	1.17971	1.25845	5.91019e-22	2.24222e-21	11.9942
BA	Renal	Hypertensive_diseases	0.129862	0.0119142	1.13876	0.0135664	1.11239	1.16557	6.57154e-17	2.15922e-16	10.9027
BA	Renal	Ischemic_heart_disease	0.239156	0.0149774	1.27032	0.0190239	1.23343	1.30802	1.61573e-43	9.59014e-43	15.9725
BA	Renal	Multiple_Sclerosis	0.252691	0.0882357	1.29101	0.113602	1.08302	1.53056	0.0310958	0.0470915	2.89917
BA	Renal	Osteoarthritis	0.11426	0.0116749	1.12112	0.0130881	1.09568	1.14699	2.18582e-14	6.53969e-14	9.78976
BA	Renal	Osteoporosis	-0.122578	0.103371	0.889283	0.0914458	0.722393	1.08332	0.325873	0.387946	-1.17712
BA	Renal	Parkinsonism	0.0128663	0.0348678	1.01353	0.0353193	0.946036	1.0846	0.496405	0.520448	0.379024
BA	Renal	Schizophrenia	0.141428	0.0855494	1.15734	0.0985458	0.974092	1.3622	0.23167	0.288616	1.6834
BA	Renal	Stroke	0.177837	0.0260855	1.19509	0.0311625	1.13509	1.2573	5.67048e-07	1.24954e-06	6.82934
BA	Renal	AllCauseMortality	0.28374	0.0129222	1.32821	0.0171618	1.29487	1.36215	1.45313e-81	1.30427e-80	21.9642
BA	Brain	Depression	-0.0443735	0.107512	0.956597	0.102845	0.774842	1.18099	0.679803	0.741603	-0.412732
BA	Brain	Diabetes	0.0448312	0.0906293	1.04585	0.0947848	0.875638	1.24915	0.620836	0.741603	0.494666
BA	Brain	Hypertensive_diseases	0.0531258	0.0607138	1.05456	0.0640265	0.93625	1.18783	0.381563	0.722333	0.87502
BA	Brain	Osteoarthritis	0.104321	0.0712079	1.10996	0.0790377	0.965368	1.2762	0.142915	0.643115	1.46502
BA	FC	Depression	-0.0960325	0.100517	0.908434	0.0913133	0.745988	1.10626	0.339384	0.718695	-0.955384
BA	FC	Diabetes	0.0528841	0.0908284	1.05431	0.0957611	0.882374	1.25974	0.560404	0.741603	0.582242
BA	FC	Hypertensive_diseases	0.028327	0.059902	1.02873	0.0616231	0.914771	1.15689	0.636293	0.741603	0.472889
BA	FC	Osteoarthritis	0.0585106	0.0676209	1.06026	0.0716955	0.928647	1.21052	0.386888	0.722333	0.865274
BA	GM	Depression	0.0399965	0.0958698	1.04081	0.099782	0.86251	1.25596	0.676535	0.741603	0.417196
BA	GM	Diabetes	0.0709216	0.0845	1.0735	0.0907105	0.909647	1.26686	0.401296	0.722333	0.839309
BA	GM	Hypertensive_diseases	0.0827581	0.0558021	1.08628	0.0606166	0.973737	1.21183	0.138057	0.643115	1.48307
BA	GM	Osteoarthritis	0.0691967	0.0647276	1.07165	0.0693651	0.943962	1.2166	0.28505	0.718695	1.06904
BA	WM	Depression	0.0924017	0.0814927	1.09681	0.0893816	0.934892	1.28676	0.256851	0.718695	1.13387
BA	WM	Diabetes	0.0348143	0.0699841	1.03543	0.0724635	0.902709	1.18766	0.618865	0.741603	0.497459
BA	WM	Hypertensive_diseases	0.065197	0.047221	1.06737	0.0504022	0.973015	1.17087	0.167378	0.669512	1.38068
BA	WM	Osteoarthritis	0.0436643	0.054759	1.04463	0.0572029	0.938321	1.16299	0.425224	0.728955	0.797392

[truncated: 16 more sheets: ST10.POA.DiseaseRisk, ST11.Mortality.Proteins, ST12.CA.Clock.with.Frailty, ST13.CA.Clock.ckb.DiseaseRisk, ST14.TPOA.with.Frailty, ST15.TPOA.with.Disease.Status, ST16.TPOA.Disease.Risk, ST17.Age.Subtype.Statistics, ST18.Age.Subtype.Disease.Risk, ST19.NSPT cohort statistics, ST20.TPOM.Comparison, ST21.Reduced Model Protein List, ST22.Reduced Model performance, ST23.Reduced with biomaker, ST24.Reduced.with.disease.risk, ST25.TPOA.protein.list]
